# Supplementary material for: Genomic Features and Construction of Streamlined Genome Chassis of Nisin Z Producer Lactococcus lactis N8
Source: Microorganisms. 2021 Dec 27;10(1):47. doi: 10.3390/microorganisms10010047 (PMC8779420; doi:10.3390/microorganisms10010047)
Supplement: Supplementary file 1 [file microorganisms-10-00047-s001.zip]

Archive with 8 entries (8 files):
- Supplementary Figure S1.pdf
- Supplementary Figure S2.pdf
- Supplementary Table S1.xlsx
- Supplementary Table S2..xlsx
- Supplementary Table S3.xlsx
- Supplementary Table S4.xlsx
- Supplementary Table S5.xlsx
- Supplementary Table S6.xlsx
