# Supplementary material for: Genomic Features and Construction of Streamlined Genome Chassis of Nisin Z Producer Lactococcus lactis N8
Source: Microorganisms. 2021 Dec 27;10(1):47. doi: 10.3390/microorganisms10010047 (PMC8779420; doi:10.3390/microorganisms10010047)
Supplement: Supplementary file 1 [file microorganisms-10-00047-s001.zip › Supplementary Table S1.xlsx]

## Sheet: Sheet1
Supplementary Table S1. Primers used in this study.
Primers Sequence (5‘–3’)
For the construction of deletion vector
(pNZ5319-up-down)
L1 up-f	CCGCTCGAGTTAATCGGTGGTGTTACTACTGG
L1 up-r	CCCATTTAAATTTTAACCGGGGTTTTTGC
L1 down-f	CCCGAGCTCCTGAAGCGGGAGATACAGAAAC
L1 down-r	GAAGATCTCGCTTCAATCTCTCCCAAAGT
L2 up-f	CCGCTCGAGGGGACACACAAGCAGCCTAT
L2 up-r	CCCATTTAAATGCACGCTCAGCACAAGTCA
L2 down-f	CCCGAGCTCTTCACTTACGGGAACTAAAAGG
L2 down-r	GAAGATCTCCAGCAAACGGAAAACTCAT
L3 up-f	CCGCTCGAGATTATTCCCAGAGTTGAGATTGT
L3 up-r	CCCATTTAAATTAGGACATGCAGACTATTCAATC
L3 down-f	CCCGAGCTCAATGTCACAATGCAATCCG
L3 down-r	GAAGATCTATCCGATGAACCGCCTAAA
L4 up-f	CCGCTCGAGCTTGAAACAAAGCGTGAG
L4 up-r	CCCATTTAAATAAGGTAAAGAAGCCGAGA
L4 down-f	CCCGAGCTCTTACCCAGTCATCCTCAT
L4 down-r	GAAGATCTGAACCTAATCTCCGCCTA
L5 up-f	CCGCTCGAGAAGCGACAGTATTACCAAC
L5 up-r	CCCATTTAAATCTTCTACCAGTTTCCGTAT
L5 down-f	CCCGAGCTCTTTTAAGGCGTATAGGATG
L5 down-r	GAAGATCTATTGGTAGTTTGGCACTT
L6 up-f	CCGCTCGAGTTTTCATCAAGGCTTAACAACC
L6 up-r	CCCATTTAAATTTTTGGCACCAATTCCATT
L6 down-f	CCCGAGCTCAAAAGTTTGGAAGGGTGGG
L6 down-r	GAAGATCTTCGTCGTAGATCCTGCAAGTA
L7 up-f	CCGCTCGAGGTGAAATTGCCTGACCAG
L7 up-r	CCCATTTAAATAAGGAATCTCAAAATGAACC
L7 down-f	CCCGAGCTCTTCAATTTTCCCAATCTATC
L7 down-r	GAAGATCTTACTACCAACCAGAGCGT
L8 up-f	CCGCTCGAGTTCACGCAAGACGATACC
L8 up-r	CCCATTTAAATGCGCTTTTAGATTAGATAGATT
L8 down-f	CCCGAGCTCTAAAGTCCCTTGGGTTGA
L8 down-r	GAAGATCTGGTGGCTGTTCTTAGCAT
For the identification of mutant strain
L1 inner-f	AAATATGGAATTGAAGCATTTAA
L1 inner-r	TTATTCTTTCGGTTTAGATGACT
L1 exter-f	TGAATAAGAATTTGAACCCTTTA
L1 exter-r	AGAAATTCTCTGATAAATTTTCTG
L2 inner-f	AAGTTCCGCATTCATGCGT
L2 inner-r	GAAAGGAACATTATGCAACAGC
L2 exter-f	TGATACTTTTTAGTTTTTTTGAACG
L2 exter-r	AATTTTGCAAGCTCCTTTTTACT
L3 inner-f	ATGGAAGTGCAAGCATTTATC
L3 inner-r	CTATTTTGTAATACGGAATTGGT
L3 exter-f	TTAGGAGCATTATTGTTAATTT
L3 exter-r	ATTTCATCGACATACTCGTCA
L4 inner-f	AAAATGGTGCTGAAACGA
L4 inner-r	TTTCCGCTAACATCTCGT
L4 exter-f	GGAACGGAATGGTCAACG
L4 exter-r	TCGGGCAAGAGGCTGTAT
L5 inner-f	GAAGCATTCGGCTCTACT
L5 inner-r	GCTCTTACCATCTTGGGT
L5 exter-f	CCAACCTGTAAAGCCGTAG
L5 exter-r	GGACTGTTTGCCAGACCA
L6 inner-f	ATCAAACAAGAAACCTCCCATT
L6 inner-r	TCATACTTAGGCGACCATCAAA
L6 exter-f	TCATACTTAGGCGACCATCAAA
L6 exter-r	TCATACTTAGGCGACCATCAAA
L7 inner-f	GAGTGGGTCGGGATTGAA
L7 inner-r	CCAACAGCGACAGGCAAT
L7 exter-f	ATAACCAATCGCACCTTT
L7 exter-r	TCAACCACTTTCAGACCC
L8 inner-f	CTTGCCTTGTCCAAACTC
L8 inner-r	CTCGCTCAATCATTCCAT
L8 exter-f	ACCTCATAACCCGCAGAA
L8 exter-r	AAAGAACGCCAAGCAAGA
Cat-f	TCAAATACAGCTTTTAGAACTGG
Cat-r	TACAGTCGGCATTATCTCATATTA
Ery-f	CTTGCTCATAAGTAACGGTAC
Ery-r	CGATACCGTTTACGAAATTGG
