# Supplementary material for: Genomic Features and Construction of Streamlined Genome Chassis of Nisin Z Producer Lactococcus lactis N8
Source: Microorganisms. 2021 Dec 27;10(1):47. doi: 10.3390/microorganisms10010047 (PMC8779420; doi:10.3390/microorganisms10010047)
Supplement: Supplementary file 1 [file microorganisms-10-00047-s001.zip › Supplementary Table S2..xlsx]

## Sheet: sheet1
Supplementary Table S2. All 202 L. lactis data retrieved by latest 5th July 2021.
#Organism Name	Strain	BioSample	BioProject	Assembly	Level	Size(Mb)	GC%	CDS	Release Date
Lactococcus lactis	21	SAMN06226865	PRJNA361178	GCA_002563575.1	Scaffold	2.50096	34.7	2355	2017-10-17T00:00:00Z
Lactococcus lactis	38	SAMN06226866	PRJNA361178	GCA_002563535.1	Scaffold	2.49734	34.7	2344	2017-10-17T00:00:00Z
Lactococcus lactis	417	SAMN06226867	PRJNA361178	GCA_002563455.1	Scaffold	2.38124	34.9	2253	2017-10-17T00:00:00Z
Lactococcus lactis	537	SAMN06226868	PRJNA361178	GCA_002563475.1	Scaffold	2.59794	34.7	2434	2017-10-17T00:00:00Z
Lactococcus lactis	1.8.12	SAMN18989267	PRJNA674638	GCA_018991645.1	Contig	2.59925	34.7	2526	2021-06-23T00:00:00Z
Lactococcus lactis	1001095IJ_161003_G11	SAMN15533268	PRJNA637878	GCA_015551225.1	Scaffold	2.32418	34.9	2169	2020-11-17T00:00:00Z
Lactococcus lactis	1001283B150209_150212_B9	SAMN15634174	PRJNA637878	GCA_015552555.1	Contig	2.50991	34.8	2392	2020-11-17T00:00:00Z
Lactococcus lactis	1001287H_170206_A1	SAMN15532856	PRJNA637878	GCA_015667015.1	Scaffold	2.52374	34.9	2383	2020-11-23T00:00:00Z
Lactococcus lactis	1001287H_170206_A2	SAMN15532855	PRJNA637878	GCA_015667075.1	Scaffold	2.57429	35	2455	2020-11-23T00:00:00Z
Lactococcus lactis	1064-C11	SAMN10095200	PRJNA492214	GCA_003838305.1	Scaffold	2.41512	35.1	2245	2018-11-26T00:00:00Z
Lactococcus lactis	1064-E11	SAMN10095201	PRJNA492214	GCA_003838385.1	Scaffold	2.41871	35.1	2251	2018-11-26T00:00:00Z
Lactococcus lactis	10WH	SAMN17842829	PRJNA684904	GCA_016939195.1	Contig	2.36716	34.9	2249	2021-02-24T00:00:00Z
Lactococcus lactis	11/19B-1	SAMD00228249	PRJDB9551	GCA_013423365.1	Contig	2.51393	35	2336	2020-07-06T21:05:00Z
Lactococcus lactis	517-B5	SAMN10095193	PRJNA492214	GCA_003841265.1	Contig	2.40722	35.1	2236	2018-11-26T00:00:00Z
Lactococcus lactis	517-C6	SAMN10095194	PRJNA492214	GCA_003839605.1	Scaffold	2.38986	35.1	2223	2018-11-26T00:00:00Z
Lactococcus lactis	641-C8	SAMN10095196	PRJNA492214	GCA_003838345.1	Scaffold	2.40915	35.1	2235	2018-11-26T00:00:00Z
Lactococcus lactis	641-D8	SAMN10095197	PRJNA492214	GCA_003838315.1	Contig	2.4065	35.1	2237	2018-11-26T00:00:00Z
Lactococcus lactis	AI06	SAMN03025289	PRJNA260691	GCA_000761115.1	Complete	2.39809	35	2190	2014-10-01T00:00:00Z
Lactococcus lactis	AM11-49	SAMN09734781	PRJNA482748	GCA_003472365.1	Scaffold	2.36303	34.9	2193	2018-09-06T00:00:00Z
Lactococcus lactis	Bpl1	SAMN02900673	PRJNA255324	GCA_000759595.1	Contig	2.3057	34.9	2110	2014-09-29T00:00:00Z
Lactococcus lactis	C2D	SAMN10699229	PRJNA513248	GCA_004022375.1	Scaffold	2.55776	34.9	2412	2019-01-14T00:00:00Z
Lactococcus lactis	CBA3619	SAMN11843663	PRJNA544551	GCA_007954765.1	Complete	2.52543	34.9148	2348	2019-08-11T00:00:00Z
Lactococcus lactis	CF101	SAMEA104417302	PRJEB23772	GCA_900240855.1	Contig	2.60043	35.5	2371	2017-12-20T00:00:00Z
Lactococcus lactis	CF102	SAMEA104417303	PRJEB23772	GCA_900240935.1	Contig	2.57363	35.1	2470	2017-12-20T00:00:00Z
Lactococcus lactis	CF103	SAMEA104417304	PRJEB23772	GCA_900240905.1	Contig	2.58094	35.4	2360	2017-12-20T00:00:00Z
Lactococcus lactis	CF104	SAMEA104417305	PRJEB23772	GCA_900240965.1	Contig	2.51617	35.1	2406	2017-12-20T00:00:00Z
Lactococcus lactis	CF105	SAMEA104417306	PRJEB23772	GCA_900240865.1	Contig	2.61882	35.5	2391	2017-12-20T00:00:00Z
Lactococcus lactis	CF106	SAMEA104417307	PRJEB23772	GCA_900240925.1	Scaffold	2.58042	35	2488	2017-12-20T00:00:00Z
Lactococcus lactis	CF107	SAMEA104417308	PRJEB23772	GCA_900240885.1	Contig	2.56802	35.5	2347	2017-12-20T00:00:00Z
Lactococcus lactis	CF108	SAMEA104417309	PRJEB23772	GCA_900240895.1	Contig	2.56542	35.6	2389	2017-12-20T00:00:00Z
Lactococcus lactis	CF109	SAMEA104417310	PRJEB23772	GCA_900240955.1	Contig	2.59106	35.1	2493	2017-12-20T00:00:00Z
Lactococcus lactis	CH_LC01	SAMN11382797	PRJNA531826	GCA_005146285.1	Scaffold	2.68815	35.2	2585	2019-05-05T00:00:00Z
Lactococcus lactis	D53	SAMN13198064	PRJNA578621	GCA_012689205.1	Contig	2.68906	35	2529	2020-04-22T00:00:00Z
Lactococcus lactis	DmW198	SAMN06837735	PRJNA384401	GCA_002115705.1	Contig	2.47875	34.8	2408	2017-04-28T00:00:00Z
Lactococcus lactis	ERR260195-bin.11	SAMEA7847198	PRJEB37358	GCA_905210045.1	Contig	2.74946	34.7	0	2021-02-01T00:00:00Z
Lactococcus lactis	FDAARGOS_1064	SAMN16357233	PRJNA231221	GCA_016127135.1	Complete	2.51274	35.1007	2365	2020-12-20T00:00:00Z
Lactococcus lactis	FDAARGOS_865	SAMN13450395	PRJNA231221	GCA_016028835.1	Complete	2.5772	35.3864	2426	2020-12-14T00:00:00Z
Lactococcus lactis	FDAARGOS_866	SAMN13450396	PRJNA231221	GCA_016028815.1	Complete	2.60566	35.2676	2462	2020-12-14T00:00:00Z
Lactococcus lactis	FDAARGOS_887	SAMN13450417	PRJNA231221	GCA_016027975.1	Complete	2.58298	35.1639	2411	2020-12-14T00:00:00Z
Lactococcus lactis	FS2	SAMN10699244	PRJNA513255	GCA_006146065.1	Contig	2.55291	35.2	2382	2019-06-07T00:00:00Z
Lactococcus lactis	gh1	SAMN11368569	PRJNA531544	GCA_004795205.1	Contig	2.426	34.9	2279	2019-04-15T00:00:00Z
Lactococcus lactis	IL1403	SAMN10387363	PRJNA503975	GCA_003722275.1	Complete	2.36567	35.3	2230	2018-11-13T00:00:00Z
Lactococcus lactis	IL6288	SAMN10386607	PRJNA503975	GCA_003722255.1	Complete	2.20822	35.3	1990	2018-11-13T00:00:00Z
Lactococcus lactis	IPLA1064	SAMN10095199	PRJNA492214	GCA_003841345.1	Scaffold	2.4565	35.1	2289	2018-11-26T00:00:00Z
Lactococcus lactis	IPLA517	SAMN10095192	PRJNA492214	GCA_003841365.1	Scaffold	2.48174	35.1	2303	2018-11-26T00:00:00Z
Lactococcus lactis	IPLA641	SAMN10095195	PRJNA492214	GCA_003841225.1	Scaffold	2.44791	35.1	2279	2018-11-26T00:00:00Z
Lactococcus lactis	IPLA729	SAMN10095198	PRJNA492214	GCA_003838425.1	Scaffold	2.42579	35	2304	2018-11-26T00:00:00Z
Lactococcus lactis	J1101437_171009_F11	SAMN15532509	PRJNA637878	GCA_015666905.1	Scaffold	2.55558	35	2434	2020-11-23T00:00:00Z
Lactococcus lactis	K_LL005	SAMN15183971	PRJNA638236	GCA_014334715.1	Complete	2.37509	35	2133	2020-08-31T00:00:00Z
Lactococcus lactis	KR	SAMN06718499	PRJNA375758	GCA_002276835.1	Contig	2.82367	34.8	2735	2017-08-29T00:00:00Z
Lactococcus lactis	L2_023_000G1_dasL2_023_000G1_concoct_62	SAMN17801088	PRJNA698986	GCA_018381915.1	Contig	2.47875	35	2380	2021-05-17T00:00:00Z
Lactococcus lactis	L3_108_000G1_dasL3_108_000G1_metabat.metabat.108_sub	SAMN17800700	PRJNA698986	GCA_018369575.1	Contig	2.27283	35.3	2167	2021-05-16T00:00:00Z
Lactococcus lactis	L62	SAMN10095186	PRJNA492214	GCA_003841395.1	Contig	2.68943	34.9	2590	2018-11-26T00:00:00Z
Lactococcus lactis	L62-C9	SAMN10095187	PRJNA492214	GCA_003841385.1	Scaffold	2.73251	34.9	2629	2018-11-26T00:00:00Z
Lactococcus lactis	L62-G9	SAMN10095188	PRJNA492214	GCA_003839745.1	Scaffold	2.73119	34.9	2635	2018-11-26T00:00:00Z
Lactococcus lactis	L81	SAMN10095183	PRJNA492214	GCA_003839705.1	Scaffold	2.71908	34.9	2614	2018-11-26T00:00:00Z
Lactococcus lactis	L81-D1	SAMN10095184	PRJNA492214	GCA_003839805.1	Scaffold	2.58038	35	2494	2018-11-26T00:00:00Z
Lactococcus lactis	L81-E2	SAMN10095185	PRJNA492214	GCA_003839645.1	Scaffold	2.73259	34.9	2637	2018-11-26T00:00:00Z
Lactococcus lactis	L98	SAMN10095189	PRJNA492214	GCA_003839715.1	Scaffold	2.48625	34.9	2372	2018-11-26T00:00:00Z
Lactococcus lactis	L98-C1	SAMN10095190	PRJNA492214	GCA_003841315.1	Contig	2.44677	34.9	2336	2018-11-26T00:00:00Z
Lactococcus lactis	L98-E2	SAMN10095191	PRJNA492214	GCA_003841285.1	Scaffold	2.45088	34.9	2334	2018-11-26T00:00:00Z
Lactococcus lactis	LA0312	SAMN18993399	PRJNA674638	GCA_018991605.1	Contig	2.35705	34.8	2246	2021-06-23T00:00:00Z
Lactococcus lactis	Lactococcus lactis	SAMEA104458535	PRJEB23938	GCA_900248205.2	Contig	2.95934	34.8	2874	2018-05-26T00:00:00Z
Lactococcus lactis	LB6	SAMN16383064	PRJNA667745	GCA_016649155.1	Contig	2.72265	34.9	2540	2021-01-15T00:00:00Z
Lactococcus lactis	LB7	SAMN16383065	PRJNA667745	GCA_016649195.1	Contig	2.89071	35	2785	2021-01-15T00:00:00Z
Lactococcus lactis	LL_AVK	SAMN13198263	PRJNA587686	GCA_009741875.1	Contig	2.43228	35.1	2220	2019-12-11T00:00:00Z
Lactococcus lactis	Ll1596	SAMN03702540	PRJNA284432	GCA_001540895.1	Contig	2.39296	35.1	2249	2016-01-25T00:00:00Z
Lactococcus lactis	M1710.1	SAMN12234804	PRJNA553339	GCA_007096405.1	Contig	2.60296	34.9	2463	2019-07-17T00:00:00Z
Lactococcus lactis	M1712.1	SAMN12234805	PRJNA553339	GCA_007097605.1	Contig	2.54644	35	2407	2019-07-17T00:00:00Z
Lactococcus lactis	M1734.1	SAMN12234806	PRJNA553339	GCA_007109175.1	Contig	2.81576	35.3	2732	2019-07-17T00:00:00Z
Lactococcus lactis	M178B.2	SAMN12234803	PRJNA553339	GCA_007096695.1	Contig	2.72093	35.5	2621	2019-07-17T00:00:00Z
Lactococcus lactis	MGYG-HGUT-00226	SAMEA5849728	PRJEB33885	GCA_902364565.1	Scaffold	2.36303	34.9	2193	2019-08-12T00:00:00Z
Lactococcus lactis	MRS45.2	SAMN12234801	PRJNA553339	GCA_007096415.1	Contig	2.71204	35	2615	2019-07-17T00:00:00Z
Lactococcus lactis	MRS76.5	SAMN12234802	PRJNA553339	GCA_007097625.1	Contig	2.67897	34.9	2550	2019-07-17T00:00:00Z
Lactococcus lactis	MS22314	SAMN13701543	PRJNA598221	GCA_010974745.1	Scaffold	2.69428	35	2516	2020-02-22T00:00:00Z
Lactococcus lactis	MS22333	SAMN13701542	PRJNA598221	GCA_010974785.1	Scaffold	2.68932	35.1	2496	2020-02-22T00:00:00Z
Lactococcus lactis	MS22336	SAMN13701541	PRJNA598221	GCA_010974775.1	Scaffold	2.69276	35	2538	2020-02-22T00:00:00Z
Lactococcus lactis	MS22337	SAMN13701540	PRJNA598221	GCA_010974735.1	Scaffold	2.65972	35.1	2526	2020-02-22T00:00:00Z
Lactococcus lactis	N35	SAMN19374079	PRJNA733006	GCA_018916825.1	Contig	2.44568	34.9	2357	2021-06-16T00:00:00Z
Lactococcus lactis	N8	SAMN15500618	PRJNA645263	GCA_014884605.1	Complete	2.57313	35.0612	2357	2020-10-13T00:00:00Z
Lactococcus lactis	OG2	SAMN06718485	PRJNA375758	GCA_002276665.1	Contig	2.70528	35	2607	2017-08-29T00:00:00Z
Lactococcus lactis	Olga1	SAMN07759902	PRJNA375758	GCA_002554775.1	Contig	2.65856	35	2572	2017-10-16T00:00:00Z
Lactococcus lactis	Olga-2	SAMN06718475	PRJNA375758	GCA_002277015.1	Contig	2.73077	35.2	2669	2017-08-29T00:00:00Z
Lactococcus lactis	PAZ	SAMN08465605	PRJNA432893	GCA_002926075.1	Contig	2.57637	34.8	2440	2018-02-13T00:00:00Z
Lactococcus lactis	PrHT3	SAMN19301478	PRJNA731925	GCA_018887275.1	Scaffold	2.51862	35.2	2393	2021-06-15T00:00:00Z
Lactococcus lactis	QH27_1	SAMN10782653	PRJNA513828	GCA_004123105.1	Scaffold	2.78172	34.9	2686	2019-01-30T00:00:00Z
Lactococcus lactis	RJAA.1(a)	SAMN09762740	PRJNA484326	GCA_014830215.1	Contig	2.33087	35	2205	2020-09-30T00:00:00Z
Lactococcus lactis	RTB018	SAMN02399558	PRJNA227015	GCA_001672265.1	Scaffold	2.48665	35.4	2419	2016-06-14T00:00:00Z
Lactococcus lactis	SP2C4	SAMN10663083	PRJNA512255	GCA_013423685.1	Scaffold	2.55588	34.9	2413	2020-07-18T00:00:00Z
Lactococcus lactis	SRCM103457	SAMN10754494	PRJNA515385	GCA_004194355.1	Chromosome	2.4582	34.9	2262	2019-02-14T00:00:00Z
Lactococcus lactis	SS45	SAMN14732122	PRJNA628134	GCA_013007555.1	Contig	2.49252	34.9	2353	2020-05-11T00:00:00Z
Lactococcus lactis	UBA11438	SAMN08017776	PRJNA417962	GCA_003450295.1	Scaffold	1.87871	34.9	1976	2018-09-04T00:00:00Z
Lactococcus lactis	UBA12272	SAMN08018260	PRJNA417962	GCA_003491905.1	Scaffold	2.04978	34.5	2102	2018-09-06T00:00:00Z
Lactococcus lactis	UBA1590	SAMN06451709	PRJNA348753	GCA_002322075.1	Scaffold	2.4735	34.8	0	2017-09-21T00:00:00Z
Lactococcus lactis	UBA5031	SAMN06455464	PRJNA348753	GCA_002416215.1	Scaffold	2.24828	35.1	0	2017-10-03T00:00:00Z
Lactococcus lactis	UBA5306	SAMN06453852	PRJNA348753	GCA_002408325.1	Scaffold	1.87927	38.5	0	2017-10-03T00:00:00Z
Lactococcus lactis	UBA5876	SAMN06454275	PRJNA348753	GCA_002432465.1	Scaffold	2.30999	34.8	0	2017-10-04T00:00:00Z
Lactococcus lactis	UBA6009	SAMN06450856	PRJNA348753	GCA_002428135.1	Scaffold	2.29018	34.9	0	2017-10-04T00:00:00Z
Lactococcus lactis	UBA6292	SAMN06452486	PRJNA348753	GCA_002439375.1	Scaffold	2.36132	34.9	0	2017-10-04T00:00:00Z
Lactococcus lactis	UBA6708	SAMN06454511	PRJNA348753	GCA_002454435.1	Scaffold	1.86359	38.6	0	2017-10-05T00:00:00Z
Lactococcus lactis	UBA7040	SAMN06451109	PRJNA348753	GCA_002492875.1	Scaffold	2.02085	34.7	0	2017-10-10T00:00:00Z
Lactococcus lactis	UBA7457	SAMN06454175	PRJNA348753	GCA_002477395.1	Scaffold	2.19315	35	0	2017-10-06T00:00:00Z
Lactococcus lactis	UBA9852	SAMN08017646	PRJNA417962	GCA_003446595.1	Scaffold	1.71373	34.6	1335	2018-09-04T00:00:00Z
Lactococcus lactis	WG2	SAMN04966301	PRJNA321149	GCA_001645365.1	Contig	2.54251	35.7	2224	2016-05-17T00:00:00Z
Lactococcus lactis	WiKim0098	SAMN16788728	PRJNA678120	GCA_016406265.1	Chromosome	2.50126	34.9692	2298	2020-12-27T00:00:00Z
Lactococcus lactis subsp. hordniae	CCUG 32210T	SAMN12771127	PRJNA563568	GCA_008692945.1	Contig	2.44587	34.8	2094	2019-09-24T00:00:00Z
Lactococcus lactis subsp. hordniae	DSM 20450	SAMN03267156	PRJNA270383	GCA_002441785.1	Contig	2.43129	34.8	2623	2017-10-04T00:00:00Z
Lactococcus lactis subsp. hordniae	NBRC 100931	SAMD00046911	PRJDB1322	GCA_001591725.1	Contig	2.42828	34.8	0	2016-02-27T00:00:00Z
Lactococcus lactis subsp. lactis	184	SAMN04955247	PRJNA320694	GCA_002078395.2	Complete	2.38494	35.1818	2360	2017-04-04T00:00:00Z
Lactococcus lactis subsp. lactis	223	SAMN09847869	PRJNA486497	GCA_016921015.1	Complete	2.53085	35.2915	2380	2021-02-23T00:00:00Z
Lactococcus lactis subsp. lactis	229	SAMN04955249	PRJNA320695	GCA_002078415.1	Complete	2.63413	35.1788	2478	2017-04-04T00:00:00Z
Lactococcus lactis subsp. lactis	267	SAMN09847870	PRJNA486498	GCA_016952955.1	Complete	2.61139	35.2861	2453	2021-02-25T00:00:00Z
Lactococcus lactis subsp. lactis	275	SAMN04955252	PRJNA320696	GCA_002078435.1	Complete	2.75389	35.3538	2598	2017-04-04T00:00:00Z
Lactococcus lactis subsp. lactis	511	SAMN02841213	PRJNA239124	GCA_000703145.1	Contig	2.48081	35.1	2307	2014-06-11T00:00:00Z
Lactococcus lactis subsp. lactis	14B4	SAMN08792430	PRJNA445480	GCA_003176835.1	Complete	2.63908	34.9706	2504	2018-05-30T00:00:00Z
Lactococcus lactis subsp. lactis	1AA59	SAMN03220318	PRJNA213570	GCA_000786755.1	Contig	2.57654	35	2458	2014-11-25T00:00:00Z
Lactococcus lactis subsp. lactis	A12	SAMEA4005236	PRJEB14157	GCA_900088425.1	Complete	2.73062	35.4946	2505	2016-07-23T00:00:00Z
Lactococcus lactis subsp. lactis	ASCC 519	SAMN06226869	PRJNA361178	GCA_002563615.1	Scaffold	2.55357	35	2437	2017-10-17T00:00:00Z
Lactococcus lactis subsp. lactis	ATCC 11454	SAMN06166710	PRJNA358121	GCA_009885055.1	Scaffold	2.42466	35	2305	2020-01-14T00:00:00Z
Lactococcus lactis subsp. lactis	ATCC 19435	SAMN08554999	PRJNA434373	GCA_004354485.1	Scaffold	2.62782	35.4	2492	2019-03-18T00:00:00Z
Lactococcus lactis subsp. lactis	BIO6722	SAMN14848238	PRJNA574342	GCA_013249195.1	Contig	2.58982	35	2455	2020-06-02T00:00:00Z
Lactococcus lactis subsp. lactis	Bu2-60	SAMN13152590	PRJNA580226	GCA_009662085.1	Contig	2.26	35.1	2095	2019-11-13T00:00:00Z
Lactococcus lactis subsp. lactis	C10	SAMN04956267	PRJNA320705	GCA_002078455.2	Complete	2.3925	35.283	2351	2017-04-04T00:00:00Z
Lactococcus lactis subsp. lactis	C17	SAMN12871693	PRJNA574907	GCA_009663925.1	Contig	2.55288	35	2423	2019-11-15T00:00:00Z
Lactococcus lactis subsp. lactis	CECT 4433	SAMN03075524	PRJNA261703	GCA_000761565.1	Contig	2.57915	34.9	0	2014-10-01T00:00:00Z
Lactococcus lactis subsp. lactis	CF111	SAMEA104606056	PRJEB23772	GCA_900291895.1	Contig	2.57508	35.1	2477	2018-02-24T00:00:00Z
Lactococcus lactis subsp. lactis	CF112	SAMEA104606057	PRJEB23772	GCA_900291885.1	Contig	2.61326	35.1	2516	2018-02-24T00:00:00Z
Lactococcus lactis subsp. lactis	CNCM I-1631	SAMN02436934	PRJNA67863	GCA_000284735.1	Contig	2.51133	34.9	2436	2011-10-28T00:00:00Z
Lactococcus lactis subsp. lactis	Dephy 1	SAMEA2272647	PRJEB4823	GCA_000493355.1	Scaffold	2.60355	35.1	2476	2013-10-22T00:00:00Z
Lactococcus lactis subsp. lactis	DPC 6756	SAMN11960007	PRJNA546489	GCA_006351065.1	Contig	2.49171	35	2346	2019-06-15T00:00:00Z
Lactococcus lactis subsp. lactis	DPC6853	SAMN03396773	PRJNA277804	GCA_001017475.1	Contig	2.50715	35	2657	2015-06-01T00:00:00Z
Lactococcus lactis subsp. lactis	DRC3	SAMN16604567	PRJNA673343	GCA_017821195.1	Complete	2.61823	35.0731	2454	2021-04-07T00:00:00Z
Lactococcus lactis subsp. lactis	E124	SAMN12276573	PRJNA553330	GCA_015714805.1	Contig	2.66923	35.2	2561	2020-12-02T00:00:00Z
Lactococcus lactis subsp. lactis	E34	SAMN04023369	PRJNA294255	GCA_001456455.1	Contig	2.37566	34.9	2242	2015-12-04T00:00:00Z
Lactococcus lactis subsp. lactis	F44	SAMN08048876	PRJNA419050	GCA_002804185.1	Complete	2.43206	35.1	2225	2017-12-04T00:00:00Z
Lactococcus lactis subsp. lactis	FAM 17927	SAMN11653947	PRJNA543085	GCA_005864305.1	Contig	2.75732	34.9	2649	2019-05-23T00:00:00Z
Lactococcus lactis subsp. lactis	G121	SAMN14943687	PRJNA633429	GCA_013395015.3	Complete	2.70682	35.0516	2496	2020-07-09T00:00:00Z
Lactococcus lactis subsp. lactis	G423	SAMN08054956	PRJNA419450	GCA_002804285.1	Complete	2.41466	35.1	2219	2017-12-04T00:00:00Z
Lactococcus lactis subsp. lactis	G50	SAMN08200704	PRJNA422936	GCA_002895225.1	Complete	2.34666	35	2183	2018-01-22T00:00:00Z
Lactococcus lactis subsp. lactis	JCM 7638	SAMD00000471	PRJDB771	GCA_001311315.1	Contig	2.39386	34.9	0	2015-10-01T00:00:00Z
Lactococcus lactis subsp. lactis	K231	SAMN04023370	PRJNA294255	GCA_001456475.1	Contig	2.33604	34.8	2189	2015-12-04T00:00:00Z
Lactococcus lactis subsp. lactis	K337	SAMN04023371	PRJNA294255	GCA_001456525.1	Contig	2.44552	34.7	2295	2015-12-04T00:00:00Z
Lactococcus lactis subsp. lactis	KF134	SAMN04026622	PRJNA294255	GCA_001456725.1	Contig	2.4634	34.8	2299	2015-12-04T00:00:00Z
Lactococcus lactis subsp. lactis	KF146	SAMN04026623	PRJNA294255	GCA_001456575.1	Contig	2.57452	34.7	2433	2015-12-04T00:00:00Z
Lactococcus lactis subsp. lactis	KF147	SAMN02603087	PRJNA41115	GCA_000025045.1	Complete	2.63565	34.8644	2446	2009-12-18T00:00:00Z
Lactococcus lactis subsp. lactis	KF196	SAMN04026624	PRJNA294255	GCA_001456595.1	Contig	2.44589	34.8	2310	2015-12-04T00:00:00Z
Lactococcus lactis subsp. lactis	KF201	SAMN04026626	PRJNA294255	GCA_001456755.1	Contig	2.37639	34.9	2258	2015-12-04T00:00:00Z
Lactococcus lactis subsp. lactis	KF24	SAMN04023416	PRJNA294255	GCA_001456505.1	Contig	2.61922	34.9	2541	2015-12-04T00:00:00Z
Lactococcus lactis subsp. lactis	KF282	SAMN04026627	PRJNA294255	GCA_001456615.1	Contig	2.65125	34.8	2515	2015-12-04T00:00:00Z
Lactococcus lactis subsp. lactis	KF67	SAMN04026621	PRJNA294255	GCA_001456545.1	Contig	2.6843	34.8	2569	2015-12-04T00:00:00Z
Lactococcus lactis subsp. lactis	KF7	SAMN04023372	PRJNA294255	GCA_001456495.1	Contig	2.36676	34.9	2216	2015-12-04T00:00:00Z
Lactococcus lactis subsp. lactis	Lac3	SAMN18740314	PRJNA721855	GCA_018320725.1	Contig	2.44181	34.8916	2310	2021-05-10T00:00:00Z
Lactococcus lactis subsp. lactis	LEY11	SAMN13634615	PRJNA596610	GCA_018195805.1	Contig	2.5137	34.8	2370	2021-04-28T00:00:00Z
Lactococcus lactis subsp. lactis	LEY12	SAMN13634616	PRJNA596610	GCA_018195775.1	Contig	2.51421	34.8	2369	2021-04-28T00:00:00Z
Lactococcus lactis subsp. lactis	LEY13	SAMN13634617	PRJNA596610	GCA_018195735.1	Contig	2.51382	34.8	2370	2021-04-28T00:00:00Z
Lactococcus lactis subsp. lactis	LEY6	SAMN13634154	PRJNA596610	GCA_018195745.1	Contig	2.87255	35.2	2788	2021-04-28T00:00:00Z
Lactococcus lactis subsp. lactis	LEY7	SAMN13634584	PRJNA596610	GCA_018195835.1	Contig	2.81433	35.2	2741	2021-04-28T00:00:00Z
Lactococcus lactis subsp. lactis	LEY8	SAMN13634590	PRJNA596610	GCA_018195795.1	Contig	2.81535	35.2	2740	2021-04-28T00:00:00Z
Lactococcus lactis subsp. lactis	Li-1	SAMN04026632	PRJNA294255	GCA_001456775.1	Contig	2.47593	34.9	2325	2015-12-04T00:00:00Z
Lactococcus lactis subsp. lactis	LMG 19460	SAMN06277565	PRJNA369137	GCA_001984785.1	Contig	2.26084	35.1	2131	2017-02-05T00:00:00Z
Lactococcus lactis subsp. lactis	LMG 7760	SAMN02797796	PRJNA222257	GCA_001437565.1	Scaffold	2.24545	35.1	2075	2015-11-06T00:00:00Z
Lactococcus lactis subsp. lactis	LMG14418	SAMN04026640	PRJNA294255	GCA_001456695.1	Contig	2.41093	35.1	2291	2015-12-04T00:00:00Z
Lactococcus lactis subsp. lactis	LMG8520	SAMN04026635	PRJNA294255	GCA_001456625.1	Contig	2.43558	34.8	2675	2015-12-04T00:00:00Z
Lactococcus lactis subsp. lactis	LMG8526	SAMN04026636	PRJNA294255	GCA_001456655.1	Contig	2.47749	34.8	2318	2015-12-04T00:00:00Z
Lactococcus lactis subsp. lactis	LMG9446	SAMN04026638	PRJNA294255	GCA_001456675.1	Contig	2.4884	34.8	2347	2015-12-04T00:00:00Z
Lactococcus lactis subsp. lactis	LMG9447	SAMN04026639	PRJNA294255	GCA_001456685.1	Contig	2.70754	34.8	2599	2015-12-04T00:00:00Z
Lactococcus lactis subsp. lactis	M20	SAMN04026641	PRJNA294255	GCA_001456785.1	Contig	2.67432	34.8	2574	2015-12-04T00:00:00Z
Lactococcus lactis subsp. lactis	ML8	SAMN04026651	PRJNA294255	GCA_001456795.1	Contig	2.52187	35.1	2410	2015-12-04T00:00:00Z
Lactococcus lactis subsp. lactis	N42	SAMN04026653	PRJNA294255	GCA_001456835.1	Contig	2.74392	35.1	2607	2015-12-04T00:00:00Z
Lactococcus lactis subsp. lactis	NBRC 100933	SAMD00034154	PRJDB1317	GCA_001514475.1	Contig	2.54762	35.2	2415	2016-01-06T00:00:00Z
Lactococcus lactis subsp. lactis	NBRC 12007	SAMD00097153	PRJDB6023	GCA_006538925.1	Contig	2.43672	35	2324	2019-06-12T21:19:00Z
Lactococcus lactis subsp. lactis	NCDO176	SAMN12871692	PRJNA574907	GCA_009663915.1	Contig	2.44533	35.1	2353	2019-11-15T00:00:00Z
Lactococcus lactis subsp. lactis	NCDO895	SAMN04026654	PRJNA294255	GCA_001456865.1	Contig	2.47306	34.9	2328	2015-12-04T00:00:00Z
Lactococcus lactis subsp. lactis	S0	SAMN03200076	PRJNA267741	GCA_000807375.1	Complete	2.4887	35.2	2303	2014-12-23T00:00:00Z
Lactococcus lactis subsp. lactis	UC06	SAMN04956292	PRJNA320710	GCA_002078975.2	Complete	2.72711	35.1922	2526	2017-04-04T00:00:00Z
Lactococcus lactis subsp. lactis	UC063	SAMN04956302	PRJNA320717	GCA_002078495.1	Complete	2.54203	35.2471	2405	2017-04-04T00:00:00Z
Lactococcus lactis subsp. lactis	UC08	SAMN04956293	PRJNA320711	GCA_002078995.2	Complete	2.54851	34.9132	2330	2017-04-04T00:00:00Z
Lactococcus lactis subsp. lactis	UC11	SAMN04956294	PRJNA320712	GCA_002078475.2	Complete	2.53817	34.9167	2322	2017-04-04T00:00:00Z
Lactococcus lactis subsp. lactis	UC317	SAMN04026655	PRJNA294255	GCA_001456855.1	Contig	2.49842	35	2371	2015-12-04T00:00:00Z
Lactococcus lactis subsp. lactis	UC77	SAMN04956303	PRJNA320718	GCA_002078615.2	Complete	2.71631	35.2823	2726	2017-04-04T00:00:00Z
Lactococcus lactis subsp. lactis	UL8	SAMN04956402	PRJNA320724	GCA_002078855.1	Complete	2.45922	35.2949	2333	2017-04-04T00:00:00Z
Lactococcus lactis subsp. lactis	W8	SAMN10060441	PRJNA490836	GCA_003594665.1	Contig	2.43947	34.9	2284	2018-09-24T00:00:00Z
Lactococcus lactis subsp. lactis	WFLU12	SAMN08212045	PRJNA423162	GCA_002866835.1	Contig	2.51141	35.1	2399	2018-01-08T00:00:00Z
Lactococcus lactis subsp. lactis	WM1	SAMN09847649	PRJNA486495	GCA_016920995.1	Complete	2.63692	35.2791	2495	2021-02-23T00:00:00Z
Lactococcus lactis subsp. lactis	WW4	SAMN12871691	PRJNA574907	GCA_009663935.1	Contig	2.55387	34.9	2447	2019-11-15T00:00:00Z
Lactococcus lactis subsp. lactis	CV56	SAMN02603398	PRJNA60377	GCA_000192705.1	Complete	2.51874	35.0942	2364	2011-03-18T00:00:00Z
Lactococcus lactis subsp. lactis	IO-1	SAMD00060995	PRJDA68077	GCA_000344575.1	Complete	2.42147	35.1	2228	2012-02-04T00:00:00Z
Lactococcus lactis subsp. lactis	KLDS 4.0325	SAMN02603468	PRJNA218564	GCA_000479375.3	Complete	2.76087	35.3584	2596	2013-10-24T00:00:00Z
Lactococcus lactis subsp. lactis	NCDO 2118	SAMN02471376	PRJNA196165	GCA_000478255.2	Complete	2.59226	34.8623	2397	2014-07-30T00:00:00Z
Lactococcus lactis subsp. lactis	YF11	SAMN02470885	PRJNA83637	GCA_000348965.1	Contig	2.52731	34.9	2353	2013-03-25T00:00:00Z
Lactococcus lactis subsp. lactis bv. diacetylactis	BGBU1-4	SAMN12627231	PRJNA561722	GCA_008180075.1	Contig	2.65568	34.9974	2543	2019-08-31T00:00:00Z
Lactococcus lactis subsp. lactis bv. diacetylactis	CRL264	SAMN04091128	PRJNA295856	GCA_001455265.1	Contig	2.57372	35	2480	2015-12-02T00:00:00Z
Lactococcus lactis subsp. lactis bv. diacetylactis	DRA4	SAMN04010513	PRJNA294255	GCA_001622235.1	Contig	2.45755	35	2347	2016-04-18T00:00:00Z
Lactococcus lactis subsp. lactis bv. diacetylactis	FM03	SAMN06061939	PRJNA355067	GCA_002148215.1	Complete	2.50925	35.2745	2340	2017-05-17T00:00:00Z
Lactococcus lactis subsp. lactis bv. diacetylactis	Ge001	SAMN17768877	PRJNA699238	GCA_017869415.1	Complete	2.40904	35.3	2239	2021-04-08T00:00:00Z
Lactococcus lactis subsp. lactis bv. diacetylactis	GL2	SAMN02796569	PRJNA247972	GCA_000721865.3	Scaffold	2.33892	35.2	2152	2014-07-02T00:00:00Z
Lactococcus lactis subsp. lactis bv. diacetylactis	S50	SAMN10167144	PRJNA494488	GCA_003627395.2	Complete	2.70217	35.1441	2549	2020-09-10T00:00:00Z
Lactococcus lactis subsp. lactis bv. diacetylactis	S50-1RSS	SAMN10167145	PRJNA494488	GCA_003627415.1	Contig	2.52663	35.2	2369	2018-10-09T00:00:00Z
Lactococcus lactis subsp. lactis bv. diacetylactis	SD96	SAMN12502795	PRJNA558943	GCA_008728875.1	Complete	2.6362	35.2868	2433	2019-09-30T00:00:00Z
Lactococcus lactis subsp. lactis bv. diacetylactis	LD61	SAMN02370934	PRJNA222498	GCA_000488975.1	Contig	2.59924	35	2506	2013-10-30T00:00:00Z
Lactococcus lactis subsp. lactis bv. diacetylactis	TIFN2	SAMN02472113	PRJNA175670	GCA_000447905.1	Contig	2.50507	35.1	2333	2013-08-19T00:00:00Z
Lactococcus lactis subsp. lactis bv. diacetylactis	TIFN4	SAMN02472114	PRJNA175672	GCA_000447985.1	Contig	2.55039	35	2402	2013-08-19T00:00:00Z
