# Supplementary material for: Genomic Features and Construction of Streamlined Genome Chassis of Nisin Z Producer Lactococcus lactis N8
Source: Microorganisms. 2021 Dec 27;10(1):47. doi: 10.3390/microorganisms10010047 (PMC8779420; doi:10.3390/microorganisms10010047)
Supplement: Supplementary file 1 [file microorganisms-10-00047-s001.zip › Supplementary Table S3.xlsx]

## Sheet: Sheet1
Supplementary Table S3. Script for converting GFF files to GFF3 files.
ls *.fna > index.txt
INDEX=$(cat index.txt | cut -d '.' -f1)
for STRAIN in ${INDEX};
do
NAME=$STRAIN;
echo -e "\e[7mProcessing sample $NAME: Lactococcus lactis ${NAME}...\e[27m";
cat ${NAME}*.gff ${NAME}*.fna > gff3/${NAME}.gff3;
done
