# Supplementary material for: Genomic Features and Construction of Streamlined Genome Chassis of Nisin Z Producer Lactococcus lactis N8
Source: Microorganisms. 2021 Dec 27;10(1):47. doi: 10.3390/microorganisms10010047 (PMC8779420; doi:10.3390/microorganisms10010047)
Supplement: Supplementary file 1 [file microorganisms-10-00047-s001.zip › Supplementary Table S4.xlsx]

## Sheet: Sheet1
Supplementary Table S4. Prophage prediction results on 42 L. lactis strains with complete genomes currently published by NCBI.
Organism name	Strain	Region lenth	Completeness	Score	CDS	Region start	Region end	possible phage	G+C percentage
Lactococcus lactis	229	27.9 Kb	intact	129	29	28102	56012	PHAGE_Lactoc_bIL310_NC_002669	0.3521
		42 Kb	intact	125	53	521533	563549	PHAGE_Lactoc_bIL309_NC_002668	0.3567
		43.7 Kb	intact	135	62	1122849	1166567	PHAGE_Lactoc_bIL285_NC_002666	0.3522
		45.1 Kb	intact	150	54	1690406	1735523	PHAGE_Lactoc_bIL286_NC_002667	0.3572
		30.3 Kb	intact	122	21	2085561	2115886	PHAGE_Lactoc_bIL311_NC_002670	0.3438
		43.2 Kb	intact	140	57	2272318	2315577	PHAGE_Lactoc_63301_NC_031017	0.3641
		7.2 Kb	incomplete	30	12	208859	216132	PHAGE_Lactoc_bIL312_NC_002671	0.3227
		12.6 Kb	incomplete	20	13	289564	302251	PHAGE_Prochl_P_SSM2_NC_006883	0.3365
		28.1 Kb	questionable	70	17	26925	55044	PHAGE_Staphy_SPbeta_like_NC_029119	0.3634
Lactococcus lactis	275	41.3 Kb	intact	140	52	473126	514491	PHAGE_Lactoc_bIL309_NC_002668	0.3571
		47.3 Kb	intact	120	44	1258910	1306288	PHAGE_Lactoc_28201_NC_031013	0.3981
		38.9 Kb	intact	150	36	2649	41550	PHAGE_Staphy_SPbeta_like_NC_029119	0.3595
		7.2 Kb	incomplete	30	12	156208	163481	PHAGE_Lactoc_bIL312_NC_002671	0.3225
		15.2 Kb	incomplete	40	23	2400870	2416126	PHAGE_Lactoc_bIL310_NC_002669	0.354
		21.3 Kb	incomplete	20	11	9259	30647	PHAGE_Staphy_SPbeta_like_NC_029119	0.3189
		18.7 Kb	incomplete	60	16	34727	53438	PHAGE_Staphy_SPbeta_like_NC_029119	0.3306
		26.8 Kb	questionable	77	24	28095	54993	PHAGE_Lactoc_bIL310_NC_002669	0.3484
		20.9 Kb	questionable	81	24	1850856	1871787	PHAGE_Lactoc_bIL311_NC_002670	0.3394
		42.1 Kb	questionable	80	43	1912613	1954752	PHAGE_Lactoc_28201_NC_031013	0.359
		40.4 Kb	questionable	90	63	2066644	2107094	PHAGE_Strept_phiARI0923_NC_030946	0.3592
		17.3 Kb	questionable	80	19	38931	56303	PHAGE_Staphy_SPbeta_like_NC_029119	0.3313
Lactococcus lactis	A12	63.4 Kb	intact	110	51	1233825	1297241	PHAGE_Lactoc_28201_NC_031013	0.4013
		50.1 Kb	intact	109	65	1947993	1998137	PHAGE_Strept_phiARI0746_NC_031907	0.353
		20.9 Kb	intact	102	17	2025582	2046571	PHAGE_Lactoc_bIL311_NC_002670	0.3344
		41.9 Kb	intact	140	42	82	42007	PHAGE_Staphy_SPbeta_like_NC_029119	0.3351
		49.8 Kb	questionable	90	42	963137	1013018	PHAGE_Lactob_PLE2_NC_031036	0.3946
		16.6 Kb	incomplete	60	25	1513427	1530106	PHAGE_Lactoc_lato_NC_004746	0.3333
		27.8 Kb	incomplete	50	23	22028	49917	PHAGE_Staphy_SPbeta_like_NC_029119	0.3331
		35.8 Kb	incomplete	40	27	2501979	2537859	PHAGE_Entero_P4_NC_001609	0.3066
Lactococcus lactis	AI06	47.8 Kb	intact	120	66	1042997	1090892	PHAGE_Lactoc_PLgT_1_NC_031016	0.3497
		45.6 Kb	questionable	81	26	274009	319619	PHAGE_Lactoc_bIL311_NC_002670	0.3473
Lactococcus lactis	CBA3619	44.4 Kb	intact	110	58	1138860	1183273	PHAGE_Lactoc_63301_NC_031017	0.3501
		16.1 Kb	incomplete	30	16	2142948	2159107	PHAGE_Lactoc_bIL312_NC_002671	0.3376
		30.2 Kb	questionable	80	22	67074	97309	PHAGE_Staphy_SPbeta_like_NC_029119	0.3272
Lactococcus lactis	G50	52.9 Kb	intact	120	55	1645098	1698060	PHAGE_Lactoc_63301_NC_031017	0.3512
		39.4 Kb	questionable	80	35	1586958	1626435	PHAGE_Lactoc_63301_NC_031017	0.3394
Lactococcus lactis	G121	43 Kb	intact	120	59	437872	480888	PHAGE_Lactoc_bIL286_NC_002667	0.3505
		60.3 Kb	intact	150	67	658865	719236	PHAGE_Lactoc_63301_NC_031017	0.3506
		38.1 Kb	intact	109	23	867205	905358	PHAGE_Lactoc_bIL311_NC_002670	0.3405
		47.4 Kb	intact	110	68	1055383	1102829	PHAGE_Strept_phiARI0923_NC_030946	0.3533
		26.3 Kb	intact	93	27	1559741	1586077	PHAGE_Lactoc_bIL310_NC_002669	0.3606
		53.8 Kb	intact	130	60	2411609	2465503	PHAGE_Lactoc_98201_NC_031064	0.3514
		32.7 Kb	questionable	82	27	1185492	1218237	PHAGE_Lactoc_bIL310_NC_002669	0.3496
		10.4 Kb	incomplete	50	11	310	10776	PHAGE_Staphy_SPbeta_like_NC_029119	0.3651
		15.5 Kb	incomplete	40	24	1439739	1455239	PHAGE_Lactoc_bIL310_NC_002669	0.3495
		10.5 Kb	incomplete	20	10	1838052	1848645	PHAGE_Strept_9872_NC_031094	0.3524
Lactococcus lactis	IL1403	27.9 Kb	intact	129	29	28459	56369	PHAGE_Lactoc_bIL310_NC_002669	0.3521
		42 Kb	intact	141	60	442046	484063	PHAGE_Lactoc_bIL309_NC_002668	0.3567
		18.9 Kb	intact	138	30	498669	517609	PHAGE_Lactoc_bIL312_NC_002671	0.3382
		43.7 Kb	intact	137	63	1033815	1077532	PHAGE_Lactoc_bIL285_NC_002666	0.3522
		42.9 Kb	intact	140	58	1414182	1457114	PHAGE_Lactoc_bIL286_NC_002667	0.352
		30.3 Kb	intact	136	24	1997771	2028095	PHAGE_Lactoc_bIL311_NC_002670	0.3436
Lactococcus lactis	IL6288	11.4 Kb	incomplete	10	12	196376	207836	PHAGE_Prochl_P_SSM2_NC_006883	0.3344
		11.7 Kb	incomplete	20	10	866753	878460	PHAGE_Lactob_PLE2_NC_031036	0.3206
		13.7 Kb	incomplete	20	12	933812	947595	PHAGE_Bacill_G_NC_023719	0.3527
		10.3 Kb	incomplete	20	8	1415972	1426272	PHAGE_Prochl_P_SSM2_NC_006883	0.3622
		9.5 Kb	incomplete	10	9	1541503	1551073	PHAGE_Halovi_HGTV_1_NC_021328	0.3483
Lactococcus lactis	KLDS4.0325	20.9 Kb	intact	111	34	521071	542031	PHAGE_Lactoc_bIL312_NC_002671	0.334
		40.2 Kb	intact	110	63	956217	996439	PHAGE_Strept_9874_NC_031023	0.3576
		37.8 Kb	intact	95	24	1894040	1931891	PHAGE_Lactoc_bIL311_NC_002670	0.3421
		49.1 Kb	intact	140	74	2072376	2121522	PHAGE_Lactoc_bIL309_NC_002668	0.3556
		42.1 Kb	intact	140	53	2339903	2382013	PHAGE_Lactoc_28201_NC_031013	0.3637
		44.3 Kb	intact	120	28	64633	109014	PHAGE_Gordon_Demosthenes_NC_030944	0.3345
		19.2 Kb	incomplete	40	8	147147	166421	PHAGE_Entero_fiAA91_ss_NC_022750	0.3389
		9.1 Kb	incomplete	30	9	934682	943816	PHAGE_Lactob_PLE2_NC_031036	0.3283
		27.3 Kb	incomplete	20	21	2203268	2230575	PHAGE_Lactoc_bIL310_NC_002669	0.3506
		15 Kb	incomplete	30	25	2464582	2479626	PHAGE_Lactoc_bIL310_NC_002669	0.3484
		17.2 Kb	incomplete	30	26	2527610	2544841	PHAGE_Lactoc_bIL310_NC_002669	0.3552
		24.8 Kb	incomplete	60	12	33	24838	PHAGE_Staphy_SPbeta_like_NC_029119	0.3573
		42.2 Kb	questionable	90	61	1712704	1754981	PHAGE_Lactoc_63301_NC_031017	0.3609
Lactococcus lactis	NCDO2118	44.8 Kb	intact	140	32	143263	188116	PHAGE_Staphy_SPbeta_like_NC_029119	0.3642
		43.3 Kb	intact	120	55	995741	1039112	PHAGE_Lactoc_bIL286_NC_002667	0.3449
		55.1 Kb	intact	150	65	1765948	1821085	PHAGE_Lactoc_bIL286_NC_002667	0.348
		20.9 Kb	intact	95	16	2060517	2081495	PHAGE_Lactoc_bIL311_NC_002670	0.3344
		7.5 Kb	incomplete	20	9	290734	298241	PHAGE_Ralsto_RSP15_NC_030948	0.3113
		32.2 Kb	questionable	82	25	2452775	2485003	PHAGE_Lactoc_bIL310_NC_002669	0.3568
Lactococcus lactis	UC06	40.1 Kb	intact	100	52	944661	984789	PHAGE_Strept_9874_NC_031023	0.348
		35.8 Kb	intact	110	34	984808	1020706	PHAGE_Lactoc_340_NC_021853	0.3249
		54.8 Kb	intact	130	61	1736848	1791739	PHAGE_Lactoc_63301_NC_031017	0.3531
		21.6 Kb	intact	109	23	1948675	1970302	PHAGE_Lactoc_bIL311_NC_002670	0.3359
		19.6 Kb	incomplete	50	10	17721	37376	PHAGE_Staphy_SPbeta_like_NC_029119	0.343
		15.8 Kb	incomplete	60	24	182727	198617	PHAGE_Lactoc_bIL312_NC_002671	0.3171
		13.7 Kb	incomplete	30	8	367765	381543	PHAGE_Oenoco_phiS11_NC_023571	0.3444
Lactococcus lactis	UC08	42.2 Kb	intact	120	32	1714	44007	PHAGE_Staphy_SPbeta_like_NC_029119	0.3316
		36.5 Kb	incomplete	50	23	1690174	1726694	PHAGE_Gordon_Ghobes_NC_031028	0.3503
		16.6 Kb	incomplete	30	22	2279981	2296663	PHAGE_Lactoc_bIL310_NC_002669	0.3556
Lactococcus lactis	UC77	28Kb	intact	129	25	28102	56193	PHAGE_Lactoc_bIL310_NC_002669(25)	0.3523
		36.9Kb	intact	139	53	526810	563731	PHAGE_Lactoc_bIL309_NC_002668(52)	0.3565
		21.8Kb	intact	138	35	578337	600152	PHAGE_Lactoc_bIL312_NC_002671(25)	0.3347
		43.7Kb	intact	140	63	1118059	1161777	PHAGE_Lactoc_bIL285_NC_002666(58)	0.3522
		45.8Kb	intact	150	56	2067072	2112928	PHAGE_Lactoc_bIL286_NC_002667(24)	0.3591
		30.3Kb	intact	143	24	2153983	2184308	PHAGE_Lactoc_bIL311_NC_002670(21)	0.3438
		43.3Kb	intact	110	50	2333923	2377242	PHAGE_Lactoc_bIL309_NC_002668(24)	0.3521
		42.2Kb	questionable	90	62	1685618	1727896	PHAGE_Lactoc_63301_NC_031017(27)	0.3608
Lactococcus lactis	WM1	25.1Kb	intact	129	25	28089	53253	PHAGE_Lactoc_bIL310_NC_002669(25)	0.351
		14.4Kb	incomplete	40	16	256006	270493	PHAGE_Entero_EfV12_phi1_NC_048087(2)	0.3475
		18.8Kb	incomplete	30	10	293209	312030	PHAGE_Mycoba_Theia_NC_028960(1)	0.3552
		39.6Kb	intact	111	35	471206	510822	PHAGE_Lactoc_bIL312_NC_002671(20)	0.3428
		5.4Kb	incomplete	10	8	689942	695436	PHAGE_Shigel_SfIV_NC_022749(2)	0.3503
		39.8Kb	incomplete	50	57	1005565	1045415	PHAGE_Lactoc_63301_NC_031017(20)	0.3555
		43.2Kb	intact	100	41	1334976	1378195	PHAGE_Lactoc_bIL285_NC_002666(18)	0.3559
		46.7Kb	intact	130	58	1407835	1454543	PHAGE_Lactoc_bIL286_NC_002667(21)	0.3533
		37.5Kb	intact	109	22	1782572	1820135	PHAGE_Lactoc_bIL311_NC_002670(16)	0.3421
		46.6Kb	intact	110	66	1964744	2011371	PHAGE_Lactoc_bIL309_NC_002668(22)	0.3503
		59.1Kb	intact	100	56	2200648	2259789	PHAGE_Lactoc_28201_NC_031013(34)	0.3577
		14.8Kb	questionable	87	21	2342221	2357085	PHAGE_Lactoc_bIL310_NC_002669(17)	0.3554
Lactococcus lactis	WiKim0098	56.1Kb	incomplete	50	56	1651654	1707833	PHAGE_Lactoc_PLgT_1_NC_031016(17)	0.3494
		14.1Kb	incomplete	30	22	1958332	1972446	PHAGE_Lactoc_bIL312_NC_002671(11)	0.3462
Lactococcus lactis	UC11	29.4Kb	incomplete	20	15	1690131	1719575	PHAGE_Strept_phiARI0131_1_NC_031901(6)	0.3479
		16.6Kb	incomplete	30	23	2280027	2296710	PHAGE_Lactoc_bIL310_NC_002669(12)	0.3556
Lactococcus lactis	SRCM103457	18.7Kb	incomplete	50	15	307142	325905	PHAGE_Lactoc_bIL309_NC_002668(2)	0.351
		61.3Kb	incomplete	60	62	344656	406036	PHAGE_Lactoc_PLgT_1_NC_031016(21)	0.3474
		18.1Kb	incomplete	20	29	779968	798160	PHAGE_Lactoc_bIL310_NC_002669(11)	0.3353
		8Kb	incomplete	20	9	1351954	1359976	PHAGE_Plankt_PaV_LD_NC_016564(2)	0.3358
		13Kb	incomplete	60	14	1645153	1658157	PHAGE_Lactoc_bIL309_NC_002668(4)	0.3353
Lactococcus lactis	SD96	47.1Kb	intact	100	54	53121	100233	PHAGE_Lactoc_bIL286_NC_002667(28)	0.3582
		21.8Kb	intact	138	35	106834	128670	PHAGE_Lactoc_bIL312_NC_002671(25)	0.3346
		22.8Kb	incomplete	50	9	222201	245009	PHAGE_Bacter_Diva_NC_028788(2)	0.3525
		42Kb	intact	133	59	1488724	1530792	PHAGE_Lactoc_bIL309_NC_002668(50)	0.3573
		43.3Kb	incomplete	60	27	1834865	1878195	PHAGE_Lactoc_bIL312_NC_002671(3)	0.344
		27.5Kb	questionable	70	16	1879571	1907158	PHAGE_Bacill_SPbeta_NC_001884(2)	0.3337
		14.9Kb	intact	129	25	2001301	2016230	PHAGE_Lactoc_bIL310_NC_002669(25)	0.3587
		15.5Kb	intact	143	23	2400586	2416120	PHAGE_Lactoc_bIL311_NC_002670(21)	0.3352
Lactococcus lactis	S50	27.9Kb	intact	129	29	28459	56369	PHAGE_Lactoc_bIL310_NC_002669(25)	0.3521
		17.7Kb	incomplete	40	10	155373	173109	PHAGE_Strept_phiARI0004_NC_031920(1)	0.3212
		36.9Kb	intact	141	55	489903	526825	PHAGE_Lactoc_bIL309_NC_002668(53)	0.3566
		21.8Kb	intact	138	35	541431	563246	PHAGE_Lactoc_bIL312_NC_002671(25)	0.3347
		50.6Kb	intact	123	61	940170	990817	PHAGE_Lactoc_bIL285_NC_002666(51)	0.35
		54Kb	intact	100	60	1514870	1568901	PHAGE_Lactoc_bIL285_NC_002666(38)	0.3546
		30.3Kb	intact	136	23	2062077	2092402	PHAGE_Lactoc_bIL311_NC_002670(20)	0.3438
		40.9Kb	questionable	88	50	2249107	2290085	PHAGE_Lactoc_28201_NC_031013(30)	0.3636
Lactococcus lactis	K_LL005	36.3Kb	intact	110	52	1634168	1670548	PHAGE_Strept_phi3396_NC_009018(11)	0.343
		18Kb	incomplete	30	27	2182353	2200411	PHAGE_Lactoc_ul36_NC_004066(4)	0.3447
Lactococcus lactis	FDAARGOS_887	43.6Kb	intact	137	63	354517	398202	PHAGE_Lactoc_bIL285_NC_002666(57)	0.3522
		30.3Kb	intact	136	23	1277728	1308053	PHAGE_Lactoc_bIL311_NC_002670(20)	0.3438
		27.9Kb	intact	129	29	1672913	1700822	PHAGE_Lactoc_bIL310_NC_002669(25)	0.3522
		25.1Kb	incomplete	20	12	1802417	1827537	PHAGE_Lactob_BH1_NC_048737(1)	0.3294
		7.2Kb	incomplete	20	11	1827765	1835038	PHAGE_Lactoc_bIL312_NC_002671(3)	0.3227
		36.9Kb	intact	141	55	2171500	2208422	PHAGE_Lactoc_bIL309_NC_002668(53)	0.3565
		21.8Kb	intact	138	35	2223028	2244843	PHAGE_Lactoc_bIL312_NC_002671(25)	0.3347
Lactococcus lactis	FDAARGOS_866	18.9Kb	intact	129	29	186278	205188	PHAGE_Lactoc_bIL310_NC_002669(25)	0.3543
		16.7Kb	intact	136	23	577639	594384	PHAGE_Lactoc_bIL311_NC_002670(20)	0.3406
		39Kb	intact	100	60	1148528	1187607	PHAGE_Lactoc_ul36_NC_004066(22)	0.3585
		47.7Kb	intact	137	63	1528531	1576291	PHAGE_Lactoc_bIL285_NC_002666(57)	0.3494
		21.8Kb	intact	138	35	2083418	2105233	PHAGE_Lactoc_bIL312_NC_002671(25)	0.3347
		42.5Kb	intact	141	56	2114160	2156668	PHAGE_Lactoc_bIL309_NC_002668(53)	0.3589
Lactococcus lactis	FDAARGOS_865	43.8Kb	intact	100	61	114444	158289	PHAGE_Lactoc_bIL309_NC_002668(24)	0.3534
		38.4Kb	intact	102	21	505985	544456	PHAGE_Lactoc_bIL311_NC_002670(15)	0.3418
		40.2Kb	intact	150	57	695689	735903	PHAGE_Strept_315.1_NC_004584(11)	0.3543
		14.5Kb	intact	113	24	1124039	1138619	PHAGE_Lactoc_bIL310_NC_002669(22)	0.3592
		21.6Kb	incomplete	20	19	1199020	1220631	PHAGE_Lactoc_bIL310_NC_002669(9)	0.3584
		15.4Kb	incomplete	30	22	1456707	1472170	PHAGE_Lactoc_bIL310_NC_002669(10)	0.3523
		50.7Kb	questionable	90	65	1575291	1626003	PHAGE_Lactoc_ul36_NC_004066(24)	0.3554
		17Kb	incomplete	20	16	1643717	1660772	PHAGE_Lactoc_bIL312_NC_002671(10)	0.3349
		32.2Kb	questionable	90	53	2158945	2191164	PHAGE_Lactoc_98201_NC_031064(13)	0.3511
		23.9Kb	incomplete	30	12	2349189	2373184	PHAGE_Lactoc_bIL312_NC_002671(2)	0.3503
Lactococcus lactis	FDAARGOS_1064	41.9Kb	questionable	85	59	126193	168118	PHAGE_Lactoc_28201_NC_031013(29)	0.3583
		14.9Kb	intact	129	25	1135774	1150703	PHAGE_Lactoc_bIL310_NC_002669(25)	0.3589
		23.3Kb	incomplete	30	24	1291560	1314862	PHAGE_Lactoc_bIL310_NC_002669(14)	0.3516
		41.6Kb	questionable	82	52	1397396	1439050	PHAGE_Lactoc_28201_NC_031013(28)	0.3637
		43.5Kb	intact	100	69	1644014	1687544	PHAGE_Lactoc_ul36_NC_004066(22)	0.3584
		20.9Kb	questionable	81	22	1841833	1862765	PHAGE_Lactoc_bIL311_NC_002670(12)	0.3393
Lactococcus lactis	DRC3	25.9Kb	questionable	87	25	28101	54043	PHAGE_Lactoc_bIL310_NC_002669(17)	0.3525
		17.7Kb	incomplete	20	10	150095	167830	PHAGE_Escher_pro483_NC_028943(1)	0.3215
		18.6Kb	incomplete	60	27	322298	340938	PHAGE_Lactoc_bIL312_NC_002671(10)	0.3432
		41.6Kb	intact	130	58	519814	561491	PHAGE_Lactoc_ul36_NC_004066(20)	0.3552
		39.7Kb	intact	122	35	565462	605172	PHAGE_Lactoc_bIL312_NC_002671(22)	0.3448
		20Kb	intact	95	19	797698	817746	PHAGE_Lactoc_bIL311_NC_002670(14)	0.3402
		18.5Kb	incomplete	40	8	1377183	1395750	PHAGE_Shigel_SfIV_NC_022749(2)	0.3336
		42.6Kb	intact	130	61	1568927	1611602	PHAGE_Lactoc_ul36_NC_004066(20)	0.3588
		10.8Kb	intact	136	19	2047059	2057931	PHAGE_Lactoc_bIL311_NC_002670(20)	0.3281
Lactococcus lactis	267	25.1Kb	intact	129	25	28092	53259	PHAGE_Lactoc_bIL310_NC_002669(25)	0.351
		14.4Kb	incomplete	40	17	256031	270519	PHAGE_Entero_EFDG1_NC_029009(2)	0.3475
		18.8Kb	incomplete	30	10	293240	312062	PHAGE_Faecal_FP_Lagaffe_NC_047911(1)	0.3552
		39.6Kb	intact	111	35	471256	510874	PHAGE_Lactoc_bIL312_NC_002671(20)	0.3428
		5.4Kb	incomplete	10	8	690016	695511	PHAGE_Shigel_SfIV_NC_022749(2)	0.3503
		6Kb	incomplete	10	8	907304	913387	PHAGE_Lactob_phiAT3_NC_005893(2)	0.3238
		42.8Kb	intact	110	57	1006904	1049740	PHAGE_Lactoc_bIL286_NC_002667(18)	0.355
		34.5Kb	intact	100	40	1083061	1117561	PHAGE_Lactoc_bIL285_NC_002666(17)	0.358
		41.7Kb	incomplete	60	58	1413146	1454937	PHAGE_Lactoc_50101_NC_031040(20)	0.3571
		7.8Kb	incomplete	10	12	1575635	1583472	PHAGE_Shigel_SfIV_NC_022749(2)	0.3511
		37.5Kb	intact	109	22	1784235	1821801	PHAGE_Lactoc_bIL311_NC_002670(16)	0.3421
		46.6Kb	intact	100	65	1966420	2013050	PHAGE_Lactoc_bIL309_NC_002668(22)	0.3503
		59.1Kb	intact	100	54	2201369	2260517	PHAGE_Lactoc_28201_NC_031013(34)	0.3577
		14.8Kb	questionable	87	21	2342961	2357827	PHAGE_Lactoc_bIL310_NC_002669(17)	0.3554
Lactococcus lactis	184	25.9Kb	questionable	87	25	28101	54043	PHAGE_Lactoc_bIL310_NC_002669(17)	0.3525
		20.8Kb	questionable	70	24	154591	175447	PHAGE_Lactoc_PLgT_1_NC_031016(5)	0.3275
		18.6Kb	incomplete	50	27	347415	366055	PHAGE_Lactoc_bIL312_NC_002671(10)	0.3432
		38.7Kb	intact	93	56	529138	567853	PHAGE_Strept_9874_NC_031023(28)	0.3576
		21.2Kb	intact	122	33	582458	603715	PHAGE_Lactoc_bIL312_NC_002671(22)	0.3352
		39.9Kb	questionable	86	65	1027470	1067390	PHAGE_Strept_9874_NC_031023(26)	0.3581
		13.2Kb	intact	136	21	2037547	2050807	PHAGE_Lactoc_bIL311_NC_002670(20)	0.327
Lactococcus lactis	Ge001	47.1Kb	intact	100	56	53121	100233	PHAGE_Lactoc_bIL286_NC_002667(27)	0.3582
		21.8Kb	intact	138	34	106855	128670	PHAGE_Lactoc_bIL312_NC_002671(25)	0.3346
		42Kb	intact	139	61	1554772	1596840	PHAGE_Lactoc_bIL309_NC_002668(52)	0.3573
		18.9Kb	intact	129	29	1990084	2008994	PHAGE_Lactoc_bIL310_NC_002669(25)	0.3542
Lactococcus lactis	UL8	25.1Kb	intact	129	25	28093	53260	PHAGE_Lactoc_bIL310_NC_002669(25)	0.351
		18.8Kb	incomplete	10	10	293242	312064	PHAGE_Strept_9874_NC_031023(4)	0.3552
		39.6Kb	intact	111	35	471262	510881	PHAGE_Lactoc_bIL312_NC_002671(20)	0.3428
		57Kb	intact	113	60	995083	1052161	PHAGE_Lactoc_98201_NC_031064(34)	0.3501
		46.6Kb	intact	150	67	1387473	1434165	PHAGE_Lactoc_bIL286_NC_002667(24)	0.3532
		37.5Kb	intact	109	22	1760751	1798317	PHAGE_Lactoc_bIL311_NC_002670(16)	0.3421
		46.6Kb	intact	100	66	1942936	1989576	PHAGE_Lactoc_bIL309_NC_002668(22)	0.3502
		49.7Kb	intact	126	58	2185845	2235606	PHAGE_Lactoc_28201_NC_031013(38)	0.3556
		14.8Kb	questionable	87	21	2318050	2332916	PHAGE_Lactoc_bIL310_NC_002669(17)	0.3554
Lactococcus lactis	UC063	25.1Kb	intact	129	25	28093	53270	PHAGE_Lactoc_bIL310_NC_002669(25)	0.3507
		41.6Kb	intact	111	31	479302	520937	PHAGE_Lactoc_bIL312_NC_002671(20)	0.3448
		20.4Kb	incomplete	30	25	1685914	1706394	PHAGE_Lactoc_bIL312_NC_002671(7)	0.3417
		53.9Kb	intact	140	72	1861778	1915684	PHAGE_Lactoc_bIL286_NC_002667(25)	0.3524
		42.2Kb	intact	96	61	2097463	2139719	PHAGE_Lactoc_ul36_NC_004066(30)	0.3596
		50.8Kb	intact	116	62	2161840	2212709	PHAGE_Lactoc_28201_NC_031013(35)	0.3589
		15.9Kb	questionable	82	26	2296160	2312138	PHAGE_Lactoc_bIL310_NC_002669(16)	0.3569
Lactococcus lactis	S0	11.7Kb	incomplete	30	21	34930	46702	PHAGE_Lactoc_bIL310_NC_002669(12)	0.3554
		13.4Kb	incomplete	50	16	901021	914500	PHAGE_Lactoc_ASCC191_NC_017688(9)	0.3424
		42.7Kb	incomplete	30	49	1045350	1088058	PHAGE_Lactoc_50101_NC_031040(21)	0.3533
		12.1Kb	incomplete	40	11	1430891	1443054	PHAGE_Lactoc_bIL286_NC_002667(5)	0.3521
		25.6Kb	incomplete	60	34	1448459	1474115	PHAGE_Strept_315.1_NC_004584(10)	0.3461
		20.4Kb	incomplete	30	9	1900585	1921018	PHAGE_Lactoc_bIL310_NC_002669(2)	0.3374
		32Kb	questionable	70	39	2090262	2122279	PHAGE_Strept_315.1_NC_004584(9)	0.3487
Lactococcus lactis	KF147	12Kb	incomplete	20	13	311989	323992	PHAGE_Strept_9874_NC_031023(4)	0.3345
		55.1Kb	intact	110	66	1063356	1118507	PHAGE_Lactoc_98201_NC_031064(31)	0.3487
		56Kb	intact	140	72	1536028	1592124	PHAGE_Lactoc_bIL286_NC_002667(29)	0.3435
		20.9Kb	intact	109	19	2052627	2073606	PHAGE_Lactoc_bIL311_NC_002670(16)	0.3345
		18.8Kb	questionable	82	30	2501570	2520450	PHAGE_Lactoc_bIL310_NC_002669(16)	0.3541
Lactococcus lactis	IO-1	53.1Kb	questionable	90	53	1706646	1759771	PHAGE_Lactoc_63301_NC_031017(27)	0.3543
		25Kb	incomplete	40	18	1951310	1976355	PHAGE_Lactoc_bIL312_NC_002671(8)	0.3398
Lactococcus lactis	G423	36.1Kb	intact	120	47	1369658	1405850	PHAGE_Strept_315.1_NC_004584(11)	0.3527
		38.3Kb	questionable	70	51	1949191	1987556	PHAGE_Strept_9871_NC_031069(14)	0.3518
		19.8Kb	incomplete	20	28	2316470	2336307	PHAGE_Lactoc_bIL310_NC_002669(11)	0.3456
Lactococcus lactis	FM03	23.9Kb	questionable	77	31	118	24071	PHAGE_Lactoc_bIL309_NC_002668(29)	0.3601
		18.9Kb	intact	122	27	39476	58437	PHAGE_Lactoc_bIL312_NC_002671(22)	0.3381
		42.9Kb	intact	110	53	1145843	1188795	PHAGE_Lactoc_bIL286_NC_002667(28)	0.3544
		24.8Kb	intact	102	17	1501473	1526273	PHAGE_Lactoc_bIL311_NC_002670(15)	0.3454
		44.1Kb	intact	103	47	1679889	1723996	PHAGE_Lactoc_28201_NC_031013(31)	0.3611
		27.9Kb	intact	129	26	1923891	1951801	PHAGE_Lactoc_bIL310_NC_002669(25)	0.3522
		22.7Kb	incomplete	20	22	2405340	2428051	PHAGE_Lactoc_bIL309_NC_002668(22)	0.356
Lactococcus lactis	F44	36.1Kb	intact	120	47	1450865	1487057	PHAGE_Strept_315.1_NC_004584(11)	0.3527
		38.3Kb	questionable	70	51	2005569	2043934	PHAGE_Strept_9871_NC_031069(14)	0.3518
		19.8Kb	incomplete	20	29	2333877	2353714	PHAGE_Lactoc_bIL310_NC_002669(12)	0.3456
Lactococcus lactis	CV56	25.1Kb	intact	103	20	28450	53626	PHAGE_Lactoc_bIL310_NC_002669(20)	0.3506
		44Kb	intact	126	58	1016991	1061035	PHAGE_Lactoc_98201_NC_031064(38)	0.3582
		20.9Kb	questionable	81	23	1722092	1743024	PHAGE_Lactoc_bIL311_NC_002670(12)	0.3393
		54.6Kb	questionable	70	61	1883260	1937861	PHAGE_Lactoc_ul36_NC_004066(22)	0.3578
		41.9Kb	intact	106	53	2145779	2187692	PHAGE_Lactoc_28201_NC_031013(32)	0.364
		15.2Kb	incomplete	30	18	2270197	2285453	PHAGE_Lactoc_bIL310_NC_002669(11)	0.3539
Lactococcus lactis	C10	25.1Kb	intact	129	25	28092	53259	PHAGE_Lactoc_bIL310_NC_002669(25)	0.351
		39.6Kb	intact	111	35	439751	479370	PHAGE_Lactoc_bIL312_NC_002671(20)	0.3428
		57Kb	intact	113	60	964690	1021768	PHAGE_Lactoc_98201_NC_031064(34)	0.3501
		43.2Kb	questionable	70	40	1317704	1360928	PHAGE_Lactoc_bIL285_NC_002666(17)	0.3559
		46.7Kb	intact	140	63	1390573	1437292	PHAGE_Lactoc_bIL286_NC_002667(22)	0.3533
		37.5Kb	intact	109	22	1762798	1800364	PHAGE_Lactoc_bIL311_NC_002670(16)	0.3421
		46.6Kb	intact	100	65	1944983	1991614	PHAGE_Lactoc_bIL309_NC_002668(22)	0.3503
		59.1Kb	intact	126	58	2179908	2239058	PHAGE_Lactoc_28201_NC_031013(38)	0.3577
Lactococcus lactis	14B4	11Kb	incomplete	30	7	652620	663681	PHAGE_Lactoc_bIL312_NC_002671(2)	0.3197
		37.1Kb	intact	140	51	953426	990580	PHAGE_Strept_315.1_NC_004584(11)	0.3459
		23Kb	incomplete	30	35	1229346	1252421	PHAGE_Lactoc_TP901_1_NC_002747(4)	0.3576
		34.1Kb	incomplete	30	35	1496542	1530738	PHAGE_Lactoc_BK5_T_NC_002796(6)	0.3318
		39.1Kb	questionable	80	52	2526358	2565535	PHAGE_Lactoc_50101_NC_031040(9)	0.3545
Lactococcus lactis	223	27.9Kb	intact	129	25	28101	56011	PHAGE_Lactoc_bIL310_NC_002669(25)	0.3521
		17.7Kb	incomplete	20	10	185216	202952	PHAGE_Strept_phiARI0031_NC_031910(1)	0.3213
		36.9Kb	intact	139	53	518940	555862	PHAGE_Lactoc_bIL309_NC_002668(52)	0.3565
		21.8Kb	intact	133	34	570468	592282	PHAGE_Lactoc_bIL312_NC_002671(24)	0.3346
		50.3Kb	questionable	70	54	1091208	1141540	PHAGE_Lactoc_BK5_T_NC_002796(26)	0.3522
		48.4Kb	intact	110	57	1705238	1753660	PHAGE_Lactoc_bIL286_NC_002667(25)	0.3547
		30.3Kb	intact	136	23	2059725	2090050	PHAGE_Lactoc_bIL311_NC_002670(20)	0.3438
		33.2Kb	incomplete	40	28	2121353	2154627	PHAGE_Lactoc_bIL310_NC_002669(11)	0.3468
		44.1Kb	questionable	76	47	2258983	2303126	PHAGE_Lactoc_28201_NC_031013(26)	0.3612
		6.7Kb	incomplete	40	7	2319774	2326536	PHAGE_Shigel_SfIV_NC_022749(2)	0.3547
