# Supplementary material for: Genomic Features and Construction of Streamlined Genome Chassis of Nisin Z Producer Lactococcus lactis N8
Source: Microorganisms. 2021 Dec 27;10(1):47. doi: 10.3390/microorganisms10010047 (PMC8779420; doi:10.3390/microorganisms10010047)
Supplement: Supplementary file 1 [file microorganisms-10-00047-s001.zip › Supplementary Table S5.xlsx]

## Sheet: Sheet1
Supplementary Table S5. The detailed information of 12 GIs.
Genomic island	Island start	Island end	Length	Gene name	Locus	Gene start	Gene end	Strand	Product
GI001 (chromosome)	583454	626486	43032		LLN8_00596	583454	584485	1	hypothetical protein
	583454	626486	43032	pgaC_1	LLN8_00597	584490	585710	1	Poly-beta-1,6-N-acetyl-D-glucosamine synthase
	583454	626486	43032		LLN8_00598	585713	585973	1	hypothetical protein
	583454	626486	43032	icaB	LLN8_00599	585983	586876	1	Poly-beta-1,6-N-acetyl-D-glucosamine N-deacetylase
	583454	626486	43032		LLN8_00600	586903	588357	1	hypothetical protein
	583454	626486	43032	brnQ	LLN8_00601	588435	589805	-1	Branched-chain amino acid transport system 2 carrier protein
	583454	626486	43032	yjdJ	LLN8_00602	590042	590314	-1	putative protein YjdJ
	583454	626486	43032		LLN8_00603	590314	590586	-1	hypothetical protein
	583454	626486	43032	nisZ	LLN8_00604	591990	592163	1	Lantibiotic nisin-Z
	583454	626486	43032	nisB	LLN8_00605	592271	595252	1	Nisin biosynthesis protein NisB
	583454	626486	43032	msbA	LLN8_00606	595263	597065	1	Lipid A export ATP-binding/permease protein MsbA
	583454	626486	43032	nisC	LLN8_00607	597058	598302	1	Nisin biosynthesis protein NisC
	583454	626486	43032	nisI	LLN8_00608	598299	599036	1	Nisin immunity protein
	583454	626486	43032	nisP	LLN8_00609	599038	601086	1	Nisin leader peptide-processing serine protease NisP
	583454	626486	43032	arlR_1	LLN8_00610	601155	601841	1	Response regulator ArlR
	583454	626486	43032	rcsC_1	LLN8_00611	601834	603177	1	Sensor histidine kinase RcsC
	583454	626486	43032	yxlF_1	LLN8_00612	603276	603953	1	putative ABC transporter ATP-binding protein YxlF
	583454	626486	43032		LLN8_00613	603955	604683	1	hypothetical protein
	583454	626486	43032		LLN8_00614	604670	605314	1	hypothetical protein
	583454	626486	43032		LLN8_00615	606427	607137	1	hypothetical protein
	583454	626486	43032		LLN8_00616	607182	608237	1	hypothetical protein
	583454	626486	43032	bcsA	LLN8_00617	608292	610271	1	Cellulose synthase catalytic subunit [UDP-forming]
	583454	626486	43032	degA_1	LLN8_00618	610368	611324	-1	HTH-type transcriptional regulator DegA
	583454	626486	43032	scrB	LLN8_00619	611321	612739	-1	Sucrose-6-phosphate hydrolase
	583454	626486	43032		LLN8_00620	612919	614871	1	hypothetical protein
	583454	626486	43032	gmuE_1	LLN8_00621	614884	615756	1	Putative fructokinase
	583454	626486	43032	hsrA_1	LLN8_00622	616270	617637	-1	putative transport protein HsrA
	583454	626486	43032	ybbH_1	LLN8_00623	617685	618506	-1	putative HTH-type transcriptional regulator YbbH
	583454	626486	43032	rpiA_1	LLN8_00624	618843	619268	1	Ribose-5-phosphate isomerase A
	583454	626486	43032	iolU_1	LLN8_00625	619345	620322	1	scyllo-inositol 2-dehydrogenase (NADP(+)) IolU
	583454	626486	43032		LLN8_00626	620473	620853	-1	hypothetical protein
	583454	626486	43032		LLN8_00627	620951	621055	-1	hypothetical protein
	583454	626486	43032		LLN8_00628	621496	622332	1	hypothetical protein
	583454	626486	43032		LLN8_00629	623036	623323	1	hypothetical protein
	583454	626486	43032	hin	LLN8_00630	623582	624136	-1	DNA-invertase hin
	583454	626486	43032		LLN8_00631	624399	624851	-1	hypothetical protein
	583454	626486	43032		LLN8_00632	625314	625919	-1	hypothetical protein
	583454	626486	43032		LLN8_00633	626295	626486	-1	hypothetical protein
GI002 (chromosome)	1188697	1213410	24713	xerS_1	LLN8_01136	1188697	1189767	-1	Tyrosine recombinase XerS
	1188697	1213410	24713		LLN8_01137	1190252	1190539	-1	hypothetical protein
	1188697	1213410	24713	xerS_2	LLN8_01138	1190623	1191678	-1	Tyrosine recombinase XerS
	1188697	1213410	24713		LLN8_01139	1192459	1192968	1	hypothetical protein
	1188697	1213410	24713		LLN8_01140	1193083	1193430	-1	hypothetical protein
	1188697	1213410	24713		LLN8_01141	1193748	1193945	1	hypothetical protein
	1188697	1213410	24713		LLN8_01142	1194415	1194834	-1	hypothetical protein
	1188697	1213410	24713		LLN8_01143	1194831	1199600	-1	hypothetical protein
	1188697	1213410	24713		LLN8_01144	1199857	1200276	-1	hypothetical protein
	1188697	1213410	24713		LLN8_01145	1200273	1204373	-1	hypothetical protein
	1188697	1213410	24713		LLN8_01146	1204381	1205097	-1	hypothetical protein
	1188697	1213410	24713	uvrA_1	LLN8_01147	1205911	1208166	-1	UvrABC system protein A
	1188697	1213410	24713		LLN8_01148	1208159	1208611	-1	hypothetical protein
	1188697	1213410	24713		LLN8_01149	1208924	1210204	-1	hypothetical protein
	1188697	1213410	24713	ytrB	LLN8_01150	1210212	1211096	-1	ABC transporter ATP-binding protein YtrB
	1188697	1213410	24713	ytrA	LLN8_01151	1211099	1211464	-1	HTH-type transcriptional repressor YtrA
	1188697	1213410	24713	aes	LLN8_01152	1211594	1212610	-1	Acetyl esterase
	1188697	1213410	24713		LLN8_01153	1213081	1213410	1	hypothetical protein
GI003 (chromosome)	1431036	1435913	4877	smc_2	LLN8_01367	1428547	1431840	-1	Chromosome partition protein Smc
	1431036	1435913	4877		LLN8_01368	1431990	1432937	-1	hypothetical protein
	1431036	1435913	4877		LLN8_01369	1433153	1436929	-1	hypothetical protein
GI004 (chromosome)	1560579	1604865	44286	thlA	LLN8_01482	1560579	1561718	-1	Acetyl-CoA acetyltransferase
	1560579	1604865	44286	mvaS	LLN8_01483	1562027	1563181	1	Hydroxymethylglutaryl-CoA synthase
	1560579	1604865	44286	nagB	LLN8_01484	1563241	1563948	-1	Glucosamine-6-phosphate deaminase
	1560579	1604865	44286	menH_3	LLN8_01485	1564100	1565059	-1	2-succinyl-6-hydroxy-2, 4-cyclohexadiene-1-carboxylate synthase
	1560579	1604865	44286	smc_3	LLN8_01486	1566707	1569163	1	Chromosome partition protein Smc
	1560579	1604865	44286	maa_3	LLN8_01487	1569984	1570493	-1	Maltose O-acetyltransferase
	1560579	1604865	44286	gtf3_1	LLN8_01488	1570519	1571589	-1	Glucosyltransferase 3
	1560579	1604865	44286	gtf3_2	LLN8_01489	1571582	1572661	-1	Glucosyltransferase 3
	1560579	1604865	44286		LLN8_01490	1572642	1573439	-1	hypothetical protein
	1560579	1604865	44286	asp2	LLN8_01491	1573432	1575048	-1	Accessory Sec system protein Asp2
	1560579	1604865	44286	asp1	LLN8_01492	1575027	1576610	-1	Accessory Sec system protein Asp1
	1560579	1604865	44286	secY_1	LLN8_01493	1576610	1577836	-1	Protein translocase subunit SecY
	1560579	1604865	44286	secA_2	LLN8_01494	1577860	1580229	-1	Protein translocase subunit SecA
	1560579	1604865	44286		LLN8_01495	1580251	1580457	-1	hypothetical protein
	1560579	1604865	44286	gtfB	LLN8_01496	1580503	1581822	-1	UDP-N-acetylglucosamine--peptide N-acetylglucosaminyltransferase stabilizing protein GtfB
	1560579	1604865	44286	gtfA_3	LLN8_01497	1581812	1583290	-1	UDP-N-acetylglucosamine--peptide N-acetylglucosaminyltransferase GtfA subunit
	1560579	1604865	44286		LLN8_01498	1583321	1583653	-1	hypothetical protein
	1560579	1604865	44286		LLN8_01499	1584591	1584830	1	hypothetical protein
	1560579	1604865	44286		LLN8_01500	1586695	1587915	1	hypothetical protein
	1560579	1604865	44286		LLN8_01501	1588166	1588486	1	hypothetical protein
	1560579	1604865	44286		LLN8_01502	1588486	1589562	1	hypothetical protein
	1560579	1604865	44286		LLN8_01503	1589559	1590110	1	hypothetical protein
	1560579	1604865	44286	repB	LLN8_01504	1590229	1590819	1	Replication protein RepB
	1560579	1604865	44286	xerC_3	LLN8_01505	1591081	1592205	1	Tyrosine recombinase XerC
	1560579	1604865	44286	queA	LLN8_01506	1592348	1593385	1	S-adenosylmethionine:tRNA ribosyltransferase-isomerase
	1560579	1604865	44286		LLN8_01507	1593462	1593773	-1	hypothetical protein
	1560579	1604865	44286		LLN8_01508	1593852	1595024	-1	hypothetical protein
	1560579	1604865	44286		LLN8_01509	1595147	1600003	-1	hypothetical protein
	1560579	1604865	44286		LLN8_01510	1600040	1600795	-1	hypothetical protein
	1560579	1604865	44286		LLN8_01511	1600833	1601591	-1	hypothetical protein
	1560579	1604865	44286		LLN8_01512	1601629	1602420	-1	hypothetical protein
	1560579	1604865	44286		LLN8_01513	1602449	1603294	-1	hypothetical protein
	1560579	1604865	44286		LLN8_01514	1603355	1603660	-1	hypothetical protein
	1560579	1604865	44286		LLN8_01515	1604248	1604865	1	hypothetical protein
GI005 (chromosome)	1622309	1629361	7052		LLN8_01533	1622309	1622494	1	hypothetical protein
	1622309	1629361	7052		LLN8_01534	1622509	1622739	1	hypothetical protein
	1622309	1629361	7052		LLN8_01536	1622994	1623245	-1	hypothetical protein
	1622309	1629361	7052		LLN8_01537	1624552	1624977	-1	Putative universal stress protein
	1622309	1629361	7052		LLN8_01538	1625255	1625848	-1	hypothetical protein
	1622309	1629361	7052		LLN8_01539	1626257	1626706	-1	hypothetical protein
	1622309	1629361	7052		LLN8_01540	1626828	1626977	-1	hypothetical protein
	1622309	1629361	7052	arsC_2	LLN8_01541	1627112	1627516	-1	Arsenate reductase
	1622309	1629361	7052		LLN8_01542	1627607	1627966	-1	hypothetical protein
	1622309	1629361	7052		LLN8_01543	1628069	1628332	-1	hypothetical protein
	1622309	1629361	7052	mshD_1	LLN8_01544	1628448	1628786	-1	Mycothiol acetyltransferase
	1622309	1629361	7052		LLN8_01545	1628826	1628954	-1	hypothetical protein
	1622309	1629361	7052		LLN8_01546	1629089	1629361	1	hypothetical protein
GI006 (chromosome)	1950028	1955065	5037		LLN8_01848	1951175	1951546	1	hypothetical protein
	1950028	1955065	5037		LLN8_01849	1951605	1952366	-1	hypothetical protein
	1950028	1955065	5037		LLN8_01850	1952368	1952820	-1	hypothetical protein
	1950028	1955065	5037		LLN8_01851	1952916	1953197	-1	hypothetical protein
	1950028	1955065	5037	mshD_2	LLN8_01852	1953217	1953723	-1	Mycothiol acetyltransferase
	1950028	1955065	5037		LLN8_01853	1953849	1954988	-1	hypothetical protein
	1950028	1955065	5037		LLN8_01854	1955062	1956345	-1	hypothetical protein
GI007 (chromosome)	1976159	1989281	13122		LLN8_01878	1976159	1976470	-1	hypothetical protein
	1976159	1989281	13122		LLN8_01879	1976743	1977084	-1	hypothetical protein
	1976159	1989281	13122		LLN8_01880	1977274	1977858	1	hypothetical protein
	1976159	1989281	13122		LLN8_01881	1977885	1978295	-1	hypothetical protein
	1976159	1989281	13122		LLN8_01882	1978308	1978550	-1	hypothetical protein
	1976159	1989281	13122		LLN8_01883	1978543	1979475	-1	hypothetical protein
	1976159	1989281	13122		LLN8_01884	1979741	1980730	-1	hypothetical protein
	1976159	1989281	13122		LLN8_01885	1980732	1981469	-1	hypothetical protein
	1976159	1989281	13122		LLN8_01886	1981590	1981805	-1	hypothetical protein
	1976159	1989281	13122		LLN8_01887	1981805	1982005	-1	hypothetical protein
	1976159	1989281	13122		LLN8_01888	1982170	1982436	1	hypothetical protein
	1976159	1989281	13122		LLN8_01889	1982427	1982612	-1	hypothetical protein
	1976159	1989281	13122		LLN8_01890	1982707	1982976	-1	hypothetical protein
	1976159	1989281	13122		LLN8_01891	1982989	1983750	-1	hypothetical protein
	1976159	1989281	13122		LLN8_01892	1983762	1984007	-1	hypothetical protein
	1976159	1989281	13122		LLN8_01893	1984139	1984393	1	hypothetical protein
	1976159	1989281	13122		LLN8_01894	1984390	1984593	-1	hypothetical protein
	1976159	1989281	13122		LLN8_01895	1984743	1985153	1	hypothetical protein
	1976159	1989281	13122		LLN8_01896	1985167	1985481	1	hypothetical protein
	1976159	1989281	13122		LLN8_01897	1985887	1986468	1	hypothetical protein
	1976159	1989281	13122		LLN8_01898	1986474	1986908	1	hypothetical protein
	1976159	1989281	13122		LLN8_01899	1986922	1987026	1	hypothetical protein
	1976159	1989281	13122	Int-Tn	LLN8_01900	1987093	1988274	1	Transposase from transposon Tn916
	1976159	1989281	13122		LLN8_01901	1988566	1989072	-1	Stress response regulator gls24
	1976159	1989281	13122		LLN8_01902	1989093	1989281	-1	hypothetical protein
GI008 (chromosome)	2322308	2341772	19464		LLN8_02253	2322308	2322754	-1	hypothetical protein
	2322308	2341772	19464	xerC_6	LLN8_02254	2323044	2324228	-1	Tyrosine recombinase XerC
	2322308	2341772	19464		LLN8_02255	2324504	2324602	-1	hypothetical protein
	2322308	2341772	19464		LLN8_02256	2324738	2325457	-1	hypothetical protein
	2322308	2341772	19464		LLN8_02257	2325846	2326196	-1	hypothetical protein
	2322308	2341772	19464	yciB	LLN8_02258	2326326	2326946	-1	Putative L,D-transpeptidase YciB
	2322308	2341772	19464		LLN8_02259	2327018	2327890	-1	hypothetical protein
	2322308	2341772	19464		LLN8_02260	2327931	2328167	-1	hypothetical protein
	2322308	2341772	19464		LLN8_02261	2328508	2329254	-1	hypothetical protein
	2322308	2341772	19464		LLN8_02262	2329318	2329566	-1	hypothetical protein
	2322308	2341772	19464		LLN8_02263	2329698	2330072	-1	hypothetical protein
	2322308	2341772	19464	ydaF	LLN8_02264	2330243	2330788	-1	Putative ribosomal N-acetyltransferase YdaF
	2322308	2341772	19464		LLN8_02265	2331173	2331526	-1	hypothetical protein
	2322308	2341772	19464		LLN8_02266	2331685	2332377	-1	hypothetical protein
	2322308	2341772	19464		LLN8_02267	2332437	2332676	1	hypothetical protein
	2322308	2341772	19464		LLN8_02268	2332678	2332794	1	hypothetical protein
	2322308	2341772	19464		LLN8_02269	2332805	2333047	1	hypothetical protein
	2322308	2341772	19464		LLN8_02270	2333050	2333742	1	hypothetical protein
	2322308	2341772	19464		LLN8_02271	2333814	2333981	1	hypothetical protein
	2322308	2341772	19464		LLN8_02272	2333993	2334406	1	hypothetical protein
	2322308	2341772	19464		LLN8_02273	2334564	2334842	1	hypothetical protein
	2322308	2341772	19464		LLN8_02274	2334876	2335115	1	hypothetical protein
	2322308	2341772	19464		LLN8_02275	2335112	2335381	1	hypothetical protein
	2322308	2341772	19464		LLN8_02276	2335365	2335559	1	hypothetical protein
	2322308	2341772	19464		LLN8_02277	2335546	2335875	1	hypothetical protein
	2322308	2341772	19464		LLN8_02278	2335879	2336673	1	hypothetical protein
	2322308	2341772	19464		LLN8_02279	2337379	2338317	1	hypothetical protein
	2322308	2341772	19464		LLN8_02280	2338535	2339077	1	hypothetical protein
	2322308	2341772	19464		LLN8_02281	2339266	2339586	1	hypothetical protein
	2322308	2341772	19464		LLN8_02282	2339586	2339918	1	hypothetical protein
	2322308	2341772	19464		LLN8_02283	2340022	2340345	1	hypothetical protein
	2322308	2341772	19464		LLN8_02284	2340414	2340773	-1	hypothetical protein
	2322308	2341772	19464		LLN8_02285	2340954	2341772	1	hypothetical protein
GI009 (plasmid 1)	56384	60867	4483		LLN8_00063	56384	56545	-1	hypothetical protein
	56384	60867	4483		LLN8_00064	56717	57628	-1	hypothetical protein
	56384	60867	4483		LLN8_00065	57722	57967	-1	hypothetical protein
	56384	60867	4483		LLN8_00066	58718	58993	1	IS3 family transposase ISSag5
	56384	60867	4483		LLN8_00067	58996	59859	1	IS3 family transposase IS-LL6
	56384	60867	4483	nrdF_1	LLN8_00068	59932	60867	-1	Ribonucleoside-diphosphate reductase 2 subunit beta
GI0010 (plasmid 1)	58996	67736	8740		LLN8_00067	58996	59859	1	IS3 family transposase IS-LL6
	58996	67736	8740	nrdF_1	LLN8_00068	59932	60867	-1	Ribonucleoside-diphosphate reductase 2 subunit beta
	58996	67736	8740	nrdF_2	LLN8_00069	61094	62047	-1	Ribonucleoside-diphosphate reductase 2 subunit beta
	58996	67736	8740	nrdE2	LLN8_00070	62057	64213	-1	Ribonucleoside-diphosphate reductase subunit alpha 2
	58996	67736	8740	tehB	LLN8_00071	64248	64445	-1	putative S-adenosyl-L-methionine-dependent methyltransferase TehB
	58996	67736	8740	nrdI	LLN8_00072	64449	65015	-1	Protein NrdI
	58996	67736	8740		LLN8_00073	65173	65844	1	Cyclic AMP receptor protein
	58996	67736	8740		LLN8_00074	65879	66118	-1	hypothetical protein
	58996	67736	8740	apbE	LLN8_00075	66192	67115	1	FAD:protein FMN transferase
	58996	67736	8740	urdA	LLN8_00076	67131	67736	1	Urocanate reductase
GI011 (plasmid 2)	15929	22625	6696		LLN8_00022	15929	16300	-1	hypothetical protein
	15929	22625	6696		LLN8_00023	16635	17177	-1	IS6 family transposase ISTeha2
	15929	22625	6696	copZ	LLN8_00024	17439	17666	-1	Copper chaperone CopZ
	15929	22625	6696	copA	LLN8_00025	17680	19650	-1	Copper-exporting P-type ATPase
	15929	22625	6696		LLN8_00026	19762	20034	-1	hypothetical protein
	15929	22625	6696		LLN8_00027	20106	20477	-1	hypothetical protein
	15929	22625	6696	copY	LLN8_00028	20498	21004	-1	Transcriptional repressor CopY
	15929	22625	6696	arlR	LLN8_00029	21957	22625	1	Response regulator ArlR
	15929	22625	6696	sasA	LLN8_00030	22613	24007	1	Adaptive-response sensory-kinase SasA
GI012 (plasmid 2)	55774	62660	6886		LLN8_00069	55774	56511	-1	hypothetical protein
	55774	62660	6886		LLN8_00070	56611	57291	-1	IS6 family transposase IS946V
	55774	62660	6886	mhpC	LLN8_00071	57402	58229	-1	2-hydroxy-6-oxononadienedioate/2-hydroxy-6- oxononatrienedioate hydrolase
	55774	62660	6886		LLN8_00072	58231	58962	-1	hypothetical protein
	55774	62660	6886	adhT	LLN8_00073	58974	59972	-1	Alcohol dehydrogenase
	55774	62660	6886	ywnA	LLN8_00074	59987	60406	-1	Putative HTH-type transcriptional regulator YwnA
	55774	62660	6886	COQ5	LLN8_00075	60803	61579	-1	2-methoxy-6-polyprenyl-1,4-benzoquinol methylase, mitochondrial
	55774	62660	6886		LLN8_00076	61732	62190	-1	hypothetical protein
	55774	62660	6886		LLN8_00077	62343	62660	-1	hypothetical protein
