# Supplementary material for: Genomic Features and Construction of Streamlined Genome Chassis of Nisin Z Producer Lactococcus lactis N8
Source: Microorganisms. 2021 Dec 27;10(1):47. doi: 10.3390/microorganisms10010047 (PMC8779420; doi:10.3390/microorganisms10010047)
Supplement: Supplementary file 1 [file microorganisms-10-00047-s001.zip › Supplementary Table S6.xlsx]

## Sheet: Sheet1
Supplementary Table S6. Secondary metabolite biosynthetic gene cluster prediction results of 43 L. lactis strains (including L. lactis N8) with complete genomes currently published by NCBI.
GenBank	Organnisim name	Strain	NRPS	Type I PKS	Type II PKS	Type III PKS	lanthipeptide	bacteriocin	RaS-RiPP Streptide-like thioether-bond RiPPs	betalactone	butyrolactone	LAP Linear azol(in)e-containing peptides
CP032500.1	Lactococcus lactis	WM1				1			4	1
CP066300.1	Lactococcus lactis	WiKim0098				1	1		2	1
CP015906.1	Lactococcus lactis	UC77				1			3	1
CP015904.1	Lactococcus lactis	UC11				1	1		1	1
CP035757.1	Lactococcus lactis	SRCM103457				1			2	1
CP043523.1	Lactococcus lactis	SD96				1			3	1
CP061322.1	Lactococcus lactis	S50				1			3	1
CP060580.1	Lactococcus lactis	K_LL005							2	1
CP065702.1	Lactococcus lactis	FDAARGOS_887				1			3	1
CP065735.1	Lactococcus lactis	FDAARGOS_866				1			3	1
CP065737.1	Lactococcus lactis	FDAARGOS_865				1			4	1
CP065984.1	Lactococcus lactis	FDAARGOS_1064				1	1		4	1
CP064835.1	Lactococcus lactis	DRC3				1			2	1
CP032058.1	Lactococcus lactis	267				1			4	1
CP015895.1	Lactococcus lactis	184				1			2	1
CP069378.1	Lactococcus lactis	Ge001				1	1		3	1
CP031926.1	Lactococcus lactis	223				1			3	1
CP015908.1	Lactococcus lactis	UL8				1		1	3	1
CP015903.1	Lactococcus lactis	UC08				1	1	1	1	1
CP015905.1	Lactococcus lactis	UC063				1			4	1
CP015902.1	Lactococcus lactis	UC06				1		3	4	1
CP010050.1	Lactococcus lactis	S0				1	1		2
CP009054.1	Lactococcus lactis	NCDO2118	1			1	1	2	1	1
CP059049.1	Lactococcus lactis	N8	1			1	1	2	1	1
CP006766.1	Lactococcus lactis	KLDS 4.0325	1			1		2		1	1
CP001834.1	Lactococcus lactis	KF147	1			1	1		1	1
AP012281.1	Lactococcus lactis	IO-1				1	1	1	2	1		1
CP033606.1	Lactococcus lactis	IL6288				1		1	2	1
CP033607.1	Lactococcus lactis	IL1403				1		1	2	1
CP025500.1	Lactococcus lactis	G50				1			2	1
CP024958.1	Lactococcus lactis	G423	1			1	1	1	1	1
CP053671.2	Lactococcus lactis	G121				1		1	1	1
CP020604.1	Lactococcus lactis	FM03				1		2	2	1
CP024954.1	Lactococcus lactis	F44	1			1	1	1	1	1
CP002365.1	Lactococcus lactis	CV56				1	1	1	3	1
CP042408.1	Lactococcus lactis	CBA3619				1		1	2	1
CP015898.1	Lactococcus lactis	C10				1		2	3	1
CP009472.1	Lactococcus lactis	AI06				1	1	1	2	1
LT599049.1	Lactococcus lactis	A12				1		3	2	1
CP028160.1	Lactococcus lactis	14B4							2	1
CP015897.1	Lactococcus lactis	275				1		1	3	1	1
CP015896.1	Lactococcus lactis	229				1		1	2	1
