# Supplementary figures and images for: Genomic Features and Construction of Streamlined Genome Chassis of Nisin Z Producer Lactococcus lactis N8
Source: MDPI journal article supplement (doi:10.3390/microorganisms10010047), 2021-12-27

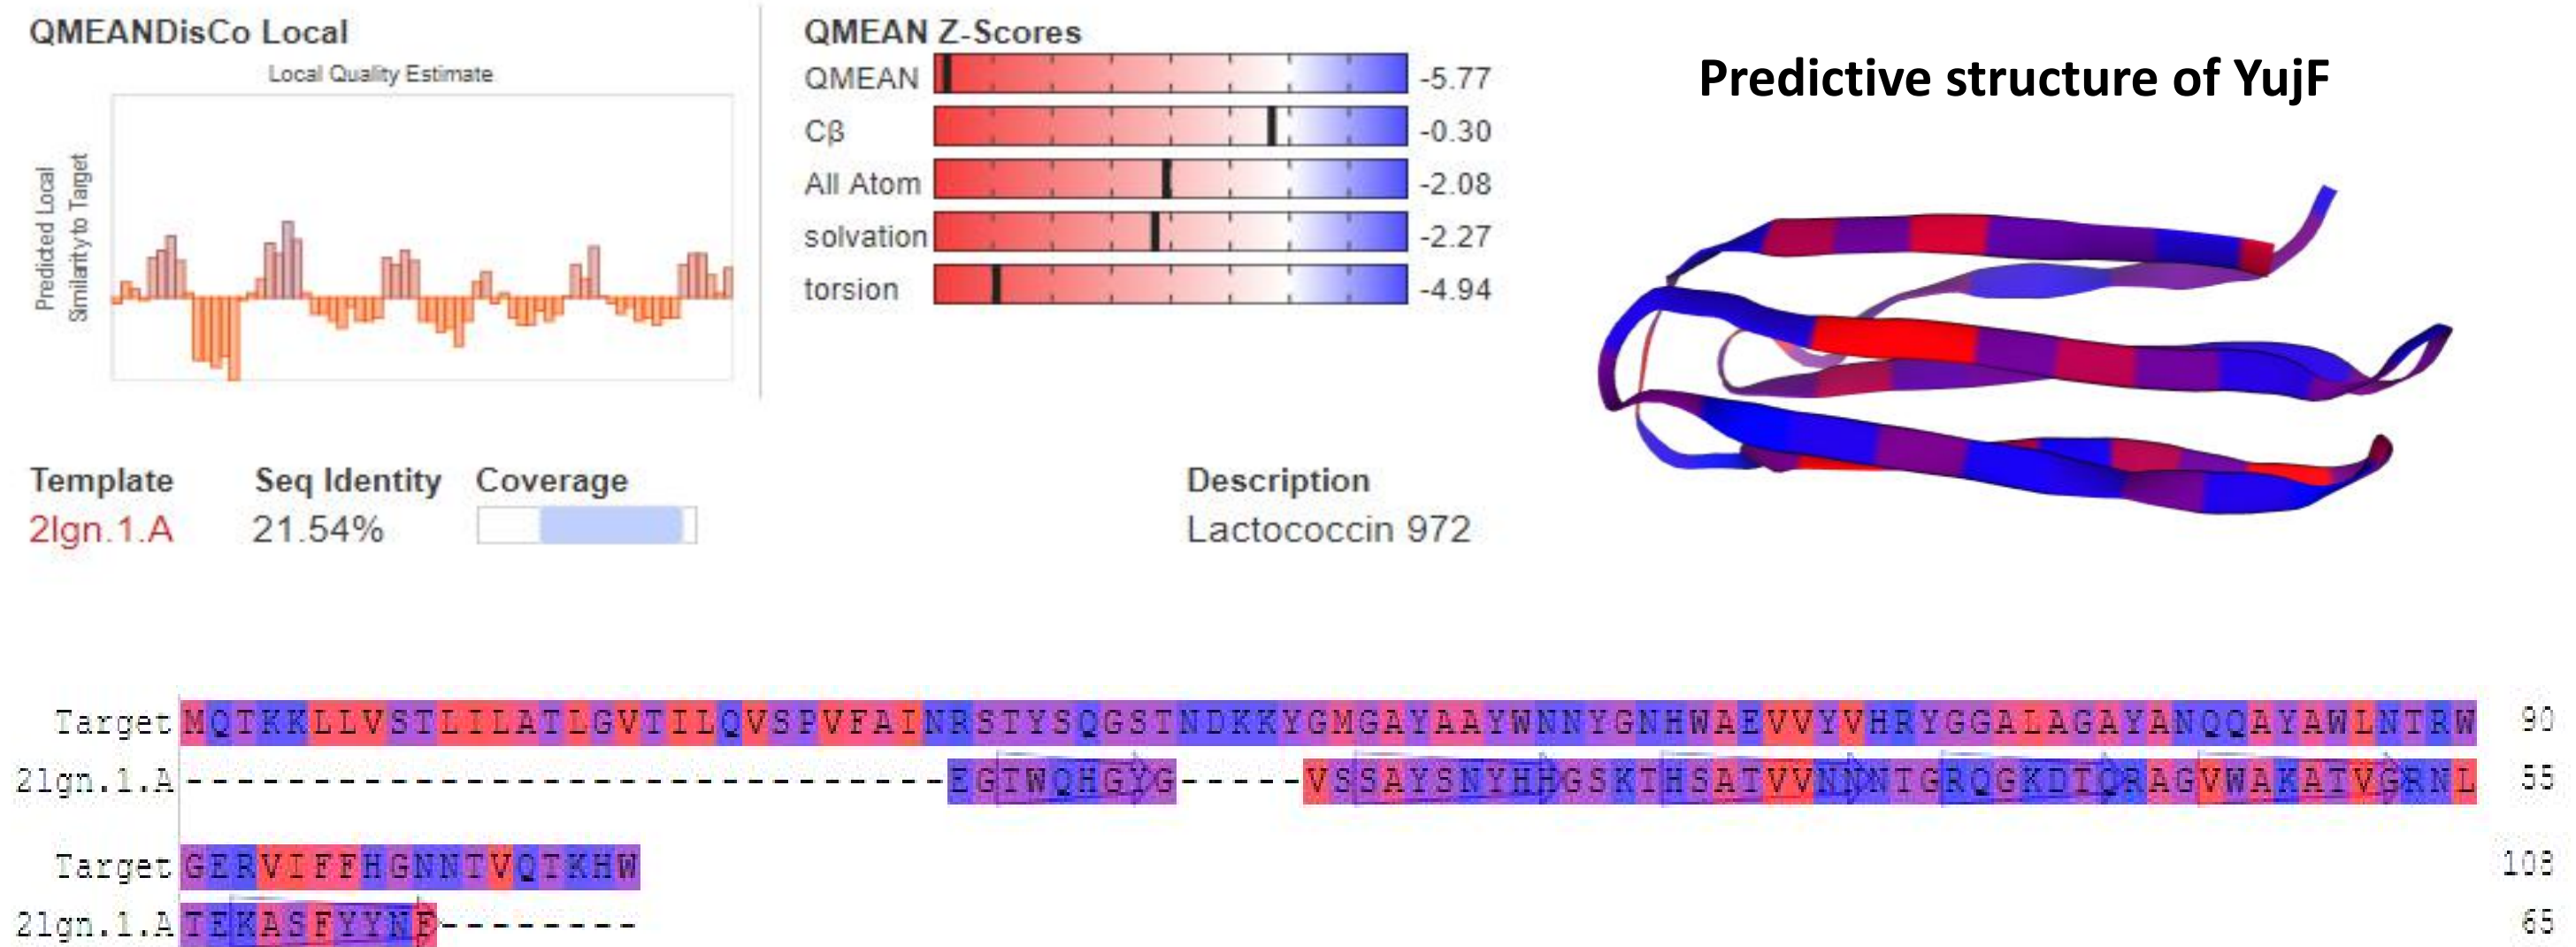

Supplementary Figure S2. Swiss Model prediction results of YujF.

Supplement: s1 [file s1]

Tree scale: 0.01

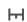

Supplementary Figure S1. The rooted phylogenetic tree of all 202 *L. lactis*.

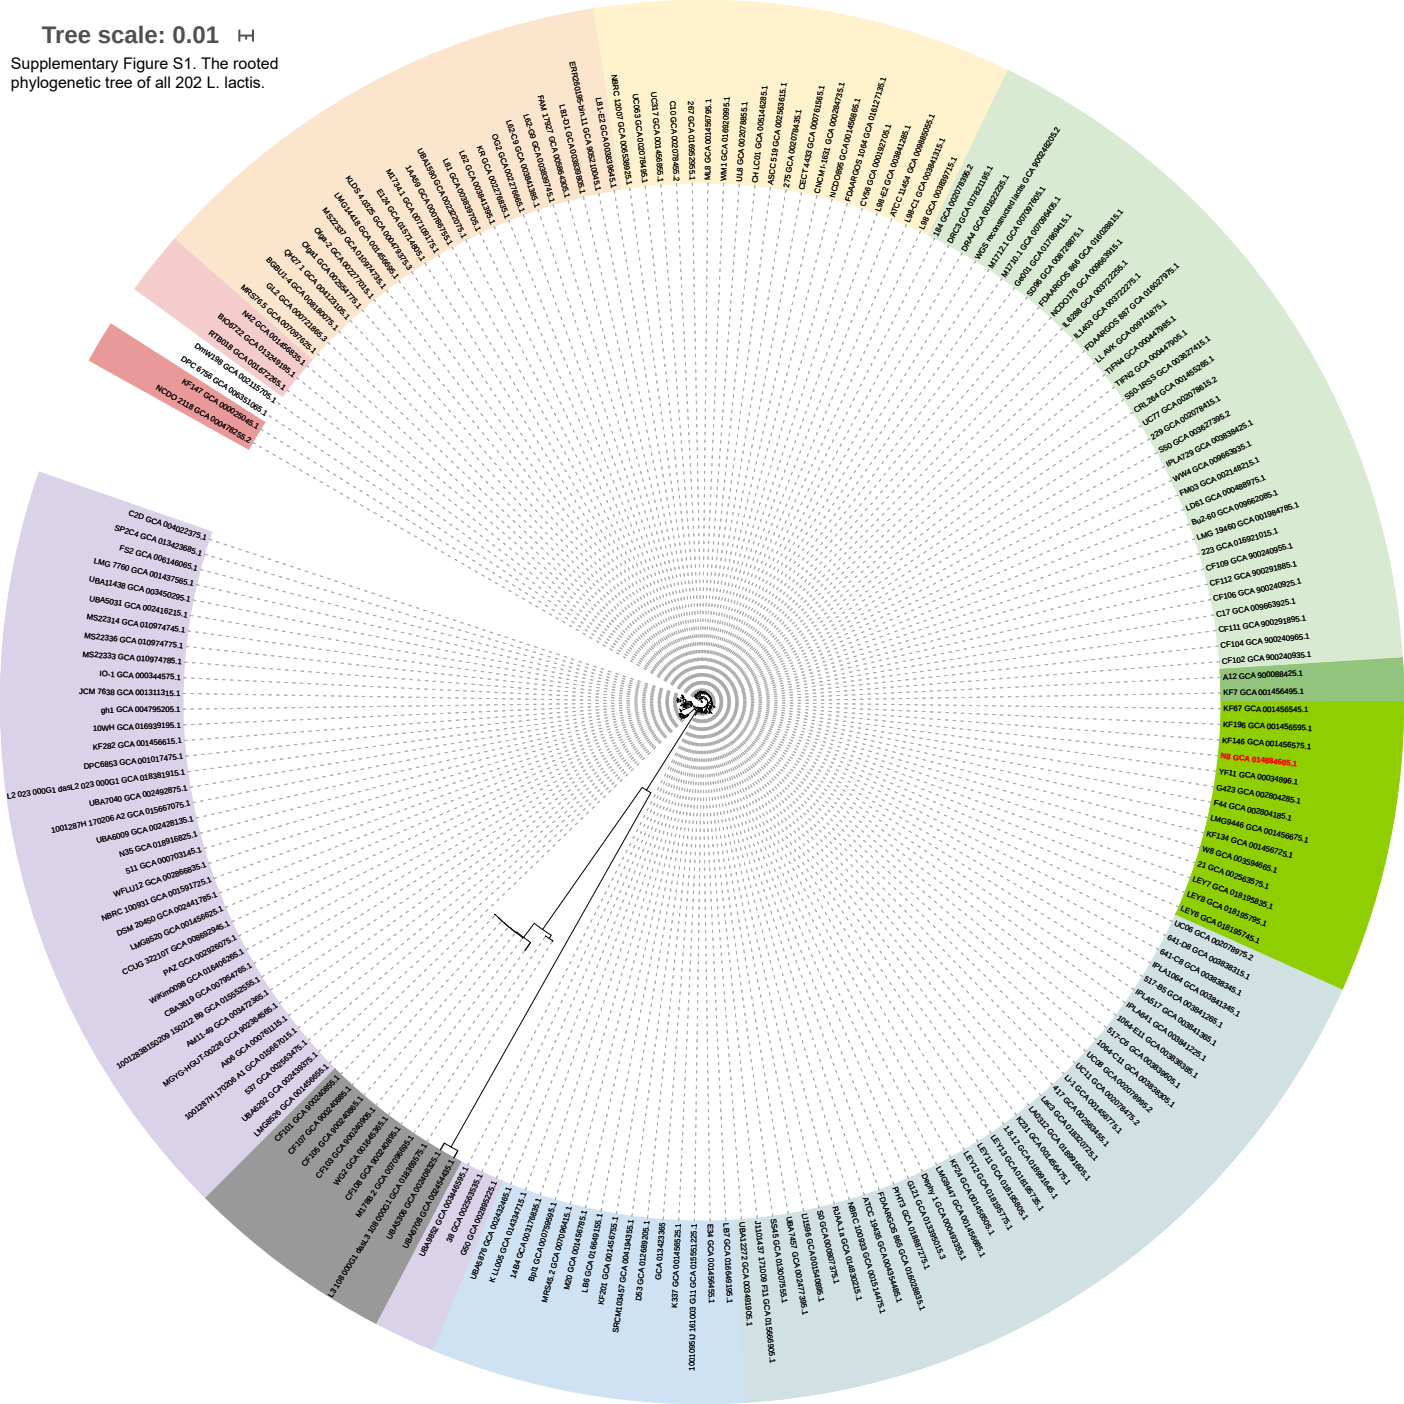

Supplement: s1 [file s1]
